# Supplementary material for: Risk factors for suicidal thoughts in adolescence-a prospective cohort study: the Young-HUNT study
Source: PubMed Central journal article supplement — BMJ Open. 2014 Aug 20;4(8):e005867. doi: 10.1136/bmjopen-2014-005867 (PMC4139646; doi:10.1136/bmjopen-2014-005867), 2014-08-20
Supplement: bmjopen-2014-005867.draft_revisions.pdf [file bmjopen-2014-005867.draft_revisions.pdf]

# BMJ Open

## Prospective investigation of risk factors for suicidal thoughts in adolescence – the Young-HUNT study.

|                                 |                                                                                                                                                                                                                                                                                                                                                                                                                                                                          |
|---------------------------------|--------------------------------------------------------------------------------------------------------------------------------------------------------------------------------------------------------------------------------------------------------------------------------------------------------------------------------------------------------------------------------------------------------------------------------------------------------------------------|
| Journal:                        | <i>BMJ Open</i>                                                                                                                                                                                                                                                                                                                                                                                                                                                          |
| Manuscript ID:                  | bmjopen-2014-005867                                                                                                                                                                                                                                                                                                                                                                                                                                                      |
| Article Type:                   | Research                                                                                                                                                                                                                                                                                                                                                                                                                                                                 |
| Date Submitted by the Author:   | 06-Jun-2014                                                                                                                                                                                                                                                                                                                                                                                                                                                              |
| Complete List of Authors:       | Strandheim, Arve; Norwegian University of Science and Technology (NTNU), HUNT research centre; Sykehuset Levanger, Child and adolescent psychiatry<br>Bjerkeset, Ottar; Høgskolen i Nord-Trøndelag, helsefag<br>Gunnell, DJ; University of Bristol, Social Medicine<br>Bjørnelv, Sigrid; NTNU, INM<br>Holmen, Turid; Norwegian University of Science and Technology, HUNT research Center, Department of Public Health and General Practice<br>Bentzen, Niels; NTNU, ISM |
| <b>Primary Subject Heading</b>: | Public health                                                                                                                                                                                                                                                                                                                                                                                                                                                            |
| Secondary Subject Heading:      | Epidemiology, Paediatrics                                                                                                                                                                                                                                                                                                                                                                                                                                                |
| Keywords:                       | Child & adolescent psychiatry < PSYCHIATRY, Suicide & self-harm < PSYCHIATRY, PREVENTIVE MEDICINE, Substance misuse < PSYCHIATRY                                                                                                                                                                                                                                                                                                                                         |
|                                 |                                                                                                                                                                                                                                                                                                                                                                                                                                                                          |

SCHOLARONE™  
Manuscripts

only

1  
2  
3  
4  
5  
6  
7  
8  
9  
10  
11  
12  
13  
14  
15  
16  
17  
18  
19  
20  
21  
22  
23  
24  
25  
26  
27  
28  
29  
30  
31  
32  
33  
34  
35  
36  
37  
38  
39  
40  
41  
42  
43  
44  
45  
46  
47  
48  
49  
50  
51  
52  
53  
54  
55  
56  
57  
58  
59  
60

# Prospective investigation of risk factors for suicidal thoughts in adolescence – the Young-HUNT study.

\*Arve Strandheim<sup>1, 2, 3</sup>, Ottar Bjerkeset<sup>4, 5</sup>, David Gunnell<sup>6</sup>, Sigrid Bjørnelv<sup>4, 7</sup>, Turid  
Lingaas Holmen<sup>2, 3</sup>, Niels Bentzen<sup>2</sup>

\*corresponding author: arve.strandheim@ntnu.no

1) Department of Child and Adolescent Psychiatry, Levanger Hospital, Nord-Trøndelag Health Trust,  
Norway

2) Department of Public Health and General Practice, the Faculty of Medicine (ISM), Norwegian  
University of Science and Technology (NTNU)

3) HUNT research centre, Department of Public Health and General Practice, Faculty of Medicine,  
NTNU

4) Department of Neuroscience, Faculty of Medicine, Norwegian University of Science and  
Technology, Trondheim, Norway

5) Department of Research and Development (RaD), Levanger Hospital, Nord-Trøndelag Health  
Trust, Norway

6) School of Social and Community Medicine, University of Bristol, UK

7) Department of Psychiatry, Levanger Hospital, Nord-Trøndelag Health Trust, Norway

Word count: 5989

None of the authors declare any conflict of interest

1  
2  
3  
4  
5  
6  
7  
8  
9  
10  
11  
12  
13  
14  
15  
16  
17  
18  
19  
20  
21  
22  
23  
24  
25  
26  
27  
28  
29  
30  
31  
32  
33  
34  
35  
36  
37  
38  
39  
40  
41  
42  
43  
44  
45  
46  
47  
48  
49  
50  
51  
52  
53  
54  
55  
56  
57  
58  
59  
60

## ABSTRACT

**Background:** Suicidal thoughts and suicidal behaviour emerge and increase during adolescence. A wide range of mental and physical health indicators, behaviours and lifestyle characteristics are reported to influence the development of suicidal thoughts in adolescence, yet the epidemiological evidence is inconclusive.

**Objectives:** To examine the associations between health- and lifestyle factors recorded in the participants' early teens, and development of suicidal thoughts during adolescence.

**Participants:** Population based cohort study of 2 399 secondary school students who attended the Young-Hunt 1 study in 1995-1997 (13-15 years old) were included in a follow-up study 4 years later (17-19 years old).

**Settings:** All student in the two relevant year-classes in Nord-Trøndelag County were invited, 80% attended both waves.

**Outcome measure:** Suicidal thoughts reported in late adolescence.

**Results:** 408 (17%, 95%Confidence Interval 15.5-18.5) of the adolescents reported suicidal thoughts at follow up, 158 (14.2%, CI 13.6-16.4) boys and 250 (19.5%, CI 18.8-22.0) girls. Baseline anxiety and depressive symptoms (adjusted Odds Ratio 1.9, CI 1.4-2.6), conduct problems (aOR 1.8, CI 1.3-2.6), overweight (aOR 1.9 CI 1.4-2.4), and muscular pain and tension (aOR 1.8, CI 1.4-2.4), were all associated with reporting suicidal thoughts at follow up.

**Conclusion:** One in six adolescents in high school experienced suicidal thoughts, girls predominating. Suicidal thoughts in late teens were most strongly associated with symptoms of anxiety/depression, conduct problems, pain/tension problems and overweight reported when participants were 13-15 years old. Specific preventive efforts in these groups might be indicated. Future research with suicide/suicidal

1  
2  
3  
4 attempts as endpoints would give us further important information both for health  
5  
6 service and prevention.  
7  
8  
9

### 10 11 **Strengths and limits of this study.**

- 12 • Whole county cohort study with follow up after 4 years
- 13 • Exposure variables: behaviour/health traits, outcome: suicidal thoughts
- 14 • Suicidal thought were prevalent in late adolescence, boys 14.2%, girls 19.5%
- 15 • Suicidal thought were associated with anxiety/depression, conduct problem,  
16 pain/tension and overweight in early adolescence  
17  
18  
19  
20  
21  
22  
23  
24  
25  
26  
27  
28

### 29 **INTRODUCTION**

30  
31  
32  
33 Suicidal thoughts and suicidal behaviours develop during adolescence and peak late  
34 in adolescence and early adulthood <sup>1</sup>. Recent research indicates that suicidal  
35 thoughts and attempts are parts of a continuum and share a common risk profile <sup>2;3</sup>. It  
36 is well known that anxiety and depression contribute to raised suicide risk <sup>4-6</sup>, yet  
37 some prospective studies have also linked anxiety and depression to increased  
38 incidence of suicidal thoughts <sup>3;7</sup>. In addition, externalizing disorders like AD/HD and  
39 Conduct Disorders have been associated with suicidal attempts, and to a lesser  
40 extent suicidal thoughts <sup>8;9</sup>. Further, empirical support has been gained for the  
41 influence of childhood adversities, as low social support, sexual abuse, domestic  
42 violence and maternal depression, on the development of suicidal thoughts during  
43 adolescence <sup>7;10;11</sup>. The findings from studies on weight problems, both under- and  
44 overweight, and suicidal thoughts are contradictory, but overweight is often reported  
45  
46  
47  
48  
49  
50  
51  
52  
53  
54  
55  
56  
57  
58  
59  
60

1  
2  
3  
4 as a risk factor among adults <sup>12-14</sup>. Even though adult alcohol problems contributes to  
5  
6 a ten-fold increase in suicide related mortality <sup>15</sup>, the relationship between alcohol  
7  
8 use and suicidal thoughts in adolescence is sparsely studied the last decade <sup>16;17</sup>.  
9  
10 Further, sleep disturbance <sup>18</sup>, pain, especially headache <sup>19;20</sup>, smoking and reduced  
11  
12 physical activity <sup>21;22</sup> all have been reported to have a positive association with  
13  
14 suicidal ideation.  
15  
16

17  
18 Complex and partly paradoxical finding on gender differences complicate the  
19  
20 understanding of adolescence suicidal ideation and behaviour. While girls report  
21  
22 suicidal thoughts more often than boys during adolescence <sup>23;24</sup>, completed suicide in  
23  
24 adolescence and young adulthood is 3 to 4 times more common in males than  
25  
26 females in the Western World <sup>23;25;26</sup>. The frequency of girls with suicidal thoughts  
27  
28 peaks about 16 years of age, while it continues to increase beyond the age of 19 in  
29  
30 boys <sup>27</sup>. Intriguingly, in adults overweight may be protective of suicide among males  
31  
32 and a risk factor among females in the general population <sup>13;28</sup>.  
33  
34

35  
36 However, few large scale prospective studies have examined a wide range of risk-  
37  
38 and protective factors for suicidal thoughts among adolescent boys and girls.

39  
40 The aim of this exploratory population study was to prospectively investigate the  
41  
42 association of different risk factors in early adolescence with the development of  
43  
44 suicidal thoughts until late adolescence. Based on the previous literature we  
45  
46 hypothesized that girls, individuals with high levels of anxiety and depression,  
47  
48 inattentiveness, conduct problems, and alcohol-intoxications at baseline would be at  
49  
50 increased risk of suicidal thoughts at follow-up.  
51  
52  
53  
54  
55  
56  
57  
58  
59  
60

## METHOD

### Study design, setting and participants

Young-HUNT 1, the first adolescent wave of the HUNT study (Nord-Trøndelag Health Study) (<http://www.ntnu.no/hunt/english>)<sup>29</sup>, took place between 1995 and 1997. All teenagers (13-19 years) attending secondary and high schools in the county were invited to participate, and 90% attended. In Young-HUNT 2, (2000-2001) students in the last two years of high school or vocational training (age 17- 19) were invited; of these 2 399 (80%) attended both Young-HUNT 1 and 2. The mean follow-up time was 3.9 years.

Both at baseline and follow-up, the participants completed a self-report questionnaire in class and underwent a physical examination; including height and weight.

All 2 399 students who took part in both Young-HUNT 1 and 2 were included in the present study, but analyses of associations with weight are based on the 2 271 participants who took part in the clinical examination.

### Measures

The Young-HUNT questionnaire includes a broad spectrum of health related variables relevant for this study (<http://www.ntnu.edu/hunt/data/que>). Some categorical variables were already dichotomized, other variables were based on instruments with multiple sub-questions and alternative answers. Variables transformation were based on factor analysis, described in former studies<sup>30;31</sup>.

### Outcome measure at follow-up

#### Suicidal thoughts

1  
2  
3  
4 At follow up the students were asked: "Have you had thoughts about taking your own  
5 life?". Positive responses were labelled as suicidal thoughts.  
6  
7  
8

#### 9 10 11 Exposure variables at baseline

##### 12 13 14 15 Anxiety and depressive symptoms

16  
17 From the Symptom Check List 90 R <sup>32</sup>, an abbreviated and previously validated five  
18 item scale, SCL-5 <sup>33;34</sup>, was integrated in the questionnaire.  
19

20  
21 According to former studies <sup>35</sup> and to our factor analysis, we included all five items in  
22 our variable.  
23  
24  
25  
26  
27

##### 28 29 Attention and conduct problems

30  
31 A 14-item school-adjustment questionnaire was included in Young-HUNT, described  
32 in previous studies <sup>30;36</sup>, was utilised to define attention- and conduct variables. A  
33 factor analysis identified two separate factors; attention problems and conduct  
34 problems. The summarized scores of all items in each category were dichotomised  
35 into low or high scores; defining scores above the 70 percentile for the study  
36 population as high.  
37  
38  
39  
40  
41  
42  
43  
44  
45  
46

##### 47 Pain and tension symptoms

48  
49 The following 4 items constituted the pain/tension variable: headache, neck pain,  
50 muscle and joint pain and palpitations the last 12 months. The values were  
51 dichotomized according to the 70<sup>th</sup> percentile, defining students with score above as  
52 high <sup>31</sup>.  
53  
54  
55  
56  
57  
58  
59  
60

#### Alcohol use

Baseline alcohol status was defined using number of reported alcohol intoxications.

The students answered the question: "Have you ever been drunk". The variable were dichotomized to "never" or "ever" called "early alcohol intoxication".

#### Smoking

Baseline smoking was assessed using the question: "Do you smoke?". Current smoking was defined as "yes" to smoking daily or occasionally.

#### Sleep disturbance

Baseline sleep disturbance was defined as difficulties initiating sleep (DIS); "In the last month, have you had difficulty falling asleep?". "Almost every night" and "often" were classified as insomnia in accordance with former research <sup>37</sup>.

#### Physical activity

Level of physical activity at baseline was estimated using the question: "With exception of school activity, how many days a week do you practice sports or exercise to the point where you breathe heavily and/or sweat?". "Four days a week or more" was classified as being regular physically active <sup>38</sup>.

#### Height and weight

Height and weight were measured by especially trained nurses to the nearest centimetre, respectively nearest half kilogram with light clothes, without shoes, jacket or outdoor garments. Body mass index <sup>39</sup> was calculated as body weight (kg) divided by the square value of height (m). Using the age- and gender-specific BMI-cut-offs

1  
2  
3  
4 for children and adolescents recommended by the International Obesity Task Force  
5  
6 underweight was defined corresponding to BMI 18.5 kg per metre squared in adults  
7  
8  
9 <sup>40</sup>. Overweight was defined using age- and gender-specific BMI-cut-offs  
10  
11 corresponding to BMI interval between 25 and 30 in adults and obese were defined  
12  
13 with cut offs corresponding to BMI 30 and beyond in adults.  
14  
15  
16  
17  
18  
19

## 20 Statistics

21  
22 PASW Statistics 18 was used for data analysis. Frequencies are given as  
23  
24 percentages and 95% Confidence Intervals for proportions were included for  
25  
26 comparison. Logistic regression was the main statistical analysis in the study,  
27  
28 presenting result as odds ratios (OR) with 95% Confidence interval (CI).  
29  
30

31 In the main analysis, univariable logistic regression analyses were first used to  
32  
33 examine the crude associations between the health and behavioural exposures with  
34  
35 suicidal ideation at follow up. Results were stratified on gender, adjustment only  
36  
37 made for age (Table 2). Then all the variables were entered in the same models  
38  
39 stratified by gender (Table 3), thus adjusting for each other in addition to age. The  
40  
41 fully adjusted models in this study include only participants that both completed all  
42  
43 the variables used from the questionnaire and had participated in the clinical  
44  
45 examination, giving a total number of completers of 1 911 in these models.  
46  
47  
48  
49  
50

51 According to results from former studies with the Young –HUNT dataset <sup>31;41;42</sup>,  
52  
53 several clinically relevant statistical interactions were tested for. Interactions were  
54  
55 shown between gender and overweight ( $p=0.01$ ), possible interactions also between  
56  
57 gender and anxiety/depressive symptoms ( $p=0.09$ ), pain and tension ( $p=0.10$ ) and  
58  
59  
60

1  
2  
3  
4 early alcohol debut ( $p=0.09$ ) (Table 2). Accordingly all analyses were stratified by  
5  
6 gender. Further, there were possible interactions shown between early alcohol  
7  
8 intoxication and anxiety/depressive symptoms ( $p= 0.07$ ) or physical activity ( $p=0.05$ )  
9  
10 analysing for suicidal thoughts. To control for these potential interactions, analysis  
11  
12 stratified on the presence of early alcohol intoxication were conducted, but only gave  
13  
14 modest effect on the ORs and are not shown here.  
15  
16  
17  
18  
19  
20  
21  
22  
23

## 24 RESULTS

25  
26  
27  
28  
29 Altogether 2 399 students (80 % of the eligible) completed the questionnaire in both  
30  
31 waves of the study, 1 115 boys (46.5%) and 1 284 girls. 2 271 students answered the  
32  
33 question on suicidal thoughts at follow-up; 408 students (17%) reported having had  
34  
35 suicidal thoughts, the prevalence was 14.2% (CI 13.6-16.4) in boys and 19.5% (CI  
36  
37 18.8-22.0) in girls.  
38

39  
40 At baseline symptoms of anxiety and depression were more frequent among girls  
41  
42 (21.0%, CI 18.8-23.2), than boys (11.5%, CI 9.6-13.4) (Table 1), as was daily or  
43  
44 occasional smoking: girls (12.1%, CI 10.3-13.9), boys (7.8%, CI 6.2-9.4). Conduct  
45  
46 problems were more frequent among boys (16.2 %, CI 14.4-18.4), than girls (5.3%,  
47  
48 CI 4.1-6.5) and more boys were physically active (35.6%, CI 32.8-38.4), compared to  
49  
50 girls (23.4%, CI 21.1-25.7).  
51

52  
53 Table 1 inserted here  
54  
55  
56  
57  
58  
59  
60

1  
2  
3  
4 In the univariable age adjusted models (Table 2), anxiety and depressive symptoms,  
5 attention- and conduct problems, insomnia, pain/tension problems and smoking at  
6 baseline more than doubled the odds for suicidal thoughts at follow-up in both  
7  
8  
9  
10  
11  
12  
13  
14  
15  
16  
17  
18  
19  
20  
21  
22  
23  
24  
25  
26  
27  
28  
29  
30  
31  
32  
33  
34  
35  
36  
37  
38  
39  
40  
41  
42  
43  
44  
45  
46  
47  
48  
49  
50  
51  
52  
53  
54  
55  
56  
57  
58  
59  
60

In the univariable age adjusted models (Table 2), anxiety and depressive symptoms, attention- and conduct problems, insomnia, pain/tension problems and smoking at baseline more than doubled the odds for suicidal thoughts at follow-up in both genders. Alcohol intoxication and overweight at baseline had moderate effects (50-70% increase) in both genders (Table 2). Underweight did not show an influence on suicidal ideation in this study. Physical activity 4-7 days a week had a protective effect (OR: 0.7, CI 0.5-0.9), whereas smoking at baseline increased odds for suicidal thoughts 4 years later (OR 2.1, CI 1.5-2.8).

Table 2 inserted here

In the fully adjusted model stratified by gender, anxiety and depressive symptoms (aOR 1.9, CI 1.4-2.6), together with pain and tension problems (aOR 1.8, CI 1.4-2.4) still seemed strongly associated with later suicidal ideation, especially among boys. Conduct problems also remained robustly associated to suicidal thoughts (aOR 1.8, CI 1.3-2.6) after adjustment. The association with overweight was strengthened (aOR 1.9, CI 1.4-2.7), with a robust relationship demonstrated also even among boys (aOR 2.0, CI 1.1-3.4). Obesity, was strongly associated with suicidal thoughts only among girls (aOR 3.1, CI 1.2-7.7) Further, smoking was associated with suicidal thoughts, specifically among girls (aOR 1.9, CI 1.2-3.1). The effect of early alcohol intoxications on crude OR for suicidal thoughts tends to weaken by correction for other important variables, especially smoking. Even used as a continuous variable, or split in three, adjustments remove the association observed in the bivariate models (Table 3). Attention problems, insomnia and early alcohol intoxications did not show statistically significant associations with suicidal thought in the fully integrated model.

1  
2  
3  
4 Table 3 inserted here  
5  
6

7 The protective effect of physical activity was evident among boys (aOR 0.6 CI 0.4-  
8 0.9) but not among girls (aOR 0.7 CI 0.5-1.1). Further stratified analyses showed that  
9 the a protective association was evident in the group not reporting early alcohol  
10 intoxication(s) (OR 0.6, CI 0.4-0.8), compared to the group with early intoxication (OR  
11 1.0, CI 0.6-1.6)  
12  
13  
14  
15  
16  
17  
18  
19  
20  
21  
22  
23  
24  
25  
26  
27

## 28 29 DISCUSSION

30  
31 Anxiety and depressive symptoms, together with pain and muscular tension, were  
32 associated with a 2-3 fold increased risk for development of suicidal thoughts during  
33 adolescence; and more so in boys than girls Attention problems also had a similar  
34 effect, which we suspect might be mediated through other health problems, like  
35 depression, visualized by reduced OR after adjustment in our analysis.  
36  
37  
38  
39  
40  
41

42 . In accordance with previous suicide-research <sup>43;44</sup>, we found that conduct problems  
43 robustly increased the odds for suicidal thoughts in both genders.. Conduct problems  
44 emerge early in child development, and include some degree of impulsivity,  
45 frustration, poor academic achievement, social marginalization and often low self-  
46 esteem <sup>45</sup>, all previously linked to suicidal behaviours and suicide <sup>46</sup>. Co-morbidity in  
47 conduct problems is common, especially with attention problems <sup>47;48</sup>. Both the  
48 features specific for (e.g. social reaction on rule breaking behaviour) and common  
49 within attention- and conduct problems (as impulsivity), can be basis for development  
50  
51  
52  
53  
54  
55  
56  
57  
58  
59  
60

1  
2  
3  
4 of suicidality. The link might also be mediated through development of depressive  
5  
6 symptoms around puberty. However, conduct problems seems robustly associated  
7  
8 with suicidal thoughts even after correcting for depression and other possible  
9  
10 confounders.

11  
12  
13 The gender distinction where boys seemed more vulnerable to anxiety and  
14  
15 depressive symptoms, is in accordance with a previous study on adolescents with  
16  
17 major depressive disorder <sup>24</sup>. The gender differences in findings may be related to  
18  
19 the fact that depressive states are less frequent among boys, or might be reported by  
20  
21 boys with more serious problems, thus representing a more extreme sample. The  
22  
23 dissimilarity may also be due to different underlying causes, and the stigma of  
24  
25 anxiety and depression may be more socially excluding among boys than girls <sup>24</sup>.

26  
27 Muscular pain and tension as a risk factor was formerly <sup>19</sup> thought to be mediated  
28  
29 through mental health problems. Our findings were, however, robust to adjustment,  
30  
31 including anxiety and depression, and merits further study.  
32  
33  
34  
35  
36  
37

38 In relation to weight/BMI, the literature indicates that the epidemiology and  
39  
40 mechanisms of suicide ideation and suicide attempts differ from those leading to a  
41  
42 completed suicide <sup>12</sup>. Consistently, population based studies of adults, have  
43  
44 demonstrated a negative association of BMI with risk of completed suicide. In  
45  
46 contrast, and in line with our findings among girls, several studies have demonstrated  
47  
48 an increased risk of suicidal ideation and suicide attempts in the obese <sup>13;49</sup>.

49  
50 Overweight might be less socially accepted in girls compared to boys, and body  
51  
52 image perspective more dominant. At baseline girls are physically more mature than  
53  
54 boys, and this difference might influence our results.  
55  
56  
57  
58  
59  
60

1  
2  
3  
4 Alcohol use disorders are frequently recorded in studies of completed suicide<sup>50</sup>, yet  
5  
6 our findings show a marginal association of early alcohol intoxications and  
7  
8 development of suicidal thoughts. Alcohol intoxications at baseline might not have  
9  
10 been the best measure to link early alcohol use to later suicidal ideation. Binge  
11  
12 drinking is a common social activity among Norwegian teenager, and might involve  
13  
14 both protective and risk-inducing factors. Alcohol intoxication might be more  
15  
16 important in actually carrying out an impulsive attempt rather than generating suicidal  
17  
18 thoughts. In addition early alcohol involvement can act as a modifier on other risk  
19  
20 factors. Additional analysis in our study confirmed that early alcohol intoxication  
21  
22 nearly doubled the effect anxiety/depressive symptoms had on suicidal ideation.  
23  
24  
25  
26  
27  
28

29 Smoking increased odds for suicidal thoughts in our study, but was heavily correlated  
30  
31 with early alcohol intoxication. Of the 244 adolescents reporting smoking at baseline  
32  
33 199 (82%) also reported early alcohol intoxications. Both alcohol use and smoking  
34  
35 can be perceived as experimental and deviant behaviour among persons under 16.  
36  
37 They tend to identify the same group of adolescents, sharing many risk factors,  
38  
39 including conduct problems.  
40  
41  
42  
43

44 Among Norwegian adolescence, physical activity seemed moderately protective  
45  
46 against suicidal ideation, but the effect was most evident among boys and among  
47  
48 students without alcohol experience in secondary school. Moderating effects of  
49  
50 gender and alcohol use on health behaviour are also reported in some newer studies  
51  
52

53 51-53  
54  
55  
56  
57

58 Strengths and limitations  
59  
60

1  
2  
3  
4 The Young-HUNT Study is a total population study with a high response rate and few  
5 drop-outs even at follow up. The questionnaire included a broad collection of health  
6 and lifestyle background variables, some pre-validated, and some tested in former  
7 research from Young-HUNT <sup>54</sup>. The study thus was representative for the population  
8 in Nord-Trøndelag, and Norway, at that time, but more important, it represents a  
9 baseline for general studies of later health effects in many years to come. The study  
10 was designed for prospective investigations, with approximately 4 years follow up  
11 time. Even if 4 years seems little in prospective studies, these years represents a  
12 great leap in adolescent development.  
13  
14  
15  
16  
17  
18  
19  
20  
21  
22  
23  
24  
25  
26

27 However, some limitations have to be pointed out. The Regional Committee for  
28 Medial and Research Ethics were concerned that even asking a question about  
29 suicidal thoughts might initiate suicidal thinking and did not allow the question in  
30 secondary school at the time. Exclusion of adolescence with suicidal thought at  
31 baseline was thus not possible, so the study is based on lifetime suicidal thoughts  
32 reported at follow up. Other studies have confirmed that suicidal thought are  
33 developing between the age of 13 and 18 <sup>55</sup>, supporting our assumption of suicidal  
34 thought mostly emerging during follow up time.  
35  
36  
37  
38  
39  
40  
41  
42  
43  
44  
45  
46

47 According to existing literature and our factor analysis it is not possible to divide  
48 anxiety from depression in SCL-5. Evidence from adult population supports that  
49 mixed anxiety and depression is strongly associated with suicide <sup>56;57</sup>.  
50  
51  
52  
53  
54  
55  
56  
57  
58  
59  
60

1  
2  
3  
4 Conclusion and implications  
5

6 Suicidal thoughts are frequent among high school students in Norway. In this study,  
7 anxiety/depression, conduct problems , overweight, together with pain and tension at  
8 the age of 13-15 years, were strongly associated with developing suicidal thoughts  
9 during late adolescence. The importance of externalizing behaviour seems under-  
10 communicated in the actual debate about risk factors and prevention of suicidal  
11 behaviours <sup>58</sup>.  
12  
13  
14  
15  
16  
17  
18  
19

20 The role of early alcohol intoxication remained inconclusive, while physical activity  
21 might protect from suicidal thoughts among boys.  
22  
23

24 To study the pathway from suicidal thoughts to completed suicide, large scale  
25 population based studies with specified baseline measures on suicidal behaviours,  
26 should be linked with hospital- and mortality registries  
27  
28  
29  
30  
31  
32  
33  
34  
35  
36  
37  
38  
39  
40  
41  
42  
43  
44  
45  
46  
47  
48  
49  
50  
51  
52  
53  
54  
55  
56  
57  
58  
59  
60

**Table 1. Baseline prevalence of health and behavioural problems, and lifestyle.** Total N=2 399, N completers suicidal thoughts=2 271, N physical examination =2 210

|                                         | Total |      | Boys |      | Girls |      |
|-----------------------------------------|-------|------|------|------|-------|------|
|                                         | N     | %    | N    | %    | N     | %    |
| <b>Mental health variables</b>          |       |      |      |      |       |      |
| Anxiety/depressive symptoms             | 397   | 16.5 | 128  | 11.5 | 269   | 21.0 |
| Attention problems                      | 448   | 18.7 | 188  | 16.9 | 260   | 20.2 |
| Conduct problems                        | 249   | 10.4 | 181  | 16.2 | 68    | 5.3  |
| Insomnia (DIS)                          | 185   | 7.7  | 67   | 6.0  | 118   | 9.2  |
| <b>Physical health variables</b>        |       |      |      |      |       |      |
| Pain and tension problems               | 453   | 18.9 | 148  | 13.3 | 305   | 23.8 |
| Underweight (Total N=2210)              | 149   | 6.2  | 60   | 5.4  | 89    | 6.9  |
| Overweight (Total N=2210)               | 303   | 12.6 | 138  | 12.4 | 165   | 12.9 |
| Obesity (Total N=2210)                  | 64    | 2.7  | 35   | 3.1  | 29    | 2.3  |
| <b>Lifestyle factors</b>                |       |      |      |      |       |      |
| Early alcohol intoxication(s)           | 624   | 26.0 | 267  | 23.9 | 357   | 27.8 |
| Physical activity (4 days/week or more) | 697   | 29.1 | 397  | 35.6 | 300   | 23.4 |
| Daily or occasional smoking             | 248   | 10.3 | 87   | 7.8  | 161   | 12.1 |

\* Over- and underweight are defined by international (IOTF) criteria based on BMI cut-off in each year- and gender-cohort

**Table 2. Logistic regression models; single input\* age adjusted associations and fully adjusted model\*\* of health and behavioural problems, and lifestyle at baseline 1995-97 with suicidal ideation at follow-up in 2000-01. N=2 271 (completers of suicidal thoughts question).**

|                               | Total |         |       |         | Boys |         |       |         | Girls |         |       |         |
|-------------------------------|-------|---------|-------|---------|------|---------|-------|---------|-------|---------|-------|---------|
|                               | OR*   | CI      | aOR** | CI      | OR*  | CI      | aOR** | CI      | OR*   | CI      | aOR** | CI      |
| <b>Mental health issues</b>   |       |         |       |         |      |         |       |         |       |         |       |         |
| Anxiety/depressive symptoms   | 2.7   | 2.1-3.4 | 1.9   | 1.4-2.6 | 3.5  | 2.3-5.4 | 2.8   | 1.7-4.8 | 2.3   | 1.7-3.1 | 1.5   | 1.0-2.2 |
| Attention problems            | 2.1   | 1.7-2.7 | 1.3   | 1.0-1.7 | 2.2  | 1.5-3.3 | 1.3   | 0.8-2.1 | 2.0   | 1.5-2.7 | 1.2   | 0.8-1.8 |
| Conduct problems              | 2.3   | 1.7-3.1 | 1.8   | 1.3-2.6 | 2.5  | 1.7-3.7 | 1.9   | 1.2-3.1 | 3.0   | 1.8-5.1 | 1.8   | 1.0-3.4 |
| Insomnia (DIS)                | 2.3   | 1.7-3.2 | 1.4   | 0.9-2.1 | 2.1  | 1.2-3.8 | 1.1   | 0.5-2.3 | 2.3   | 1.6-3.5 | 1.5   | 1.0-2.6 |
| <b>Physical health issues</b> |       |         |       |         |      |         |       |         |       |         |       |         |
| Pain and tension problems     | 2.7   | 2.1-3.4 | 1.8   | 1.4-2.4 | 3.1  | 2.1-4.8 | 2.0   | 1.2-3.3 | 2.3   | 1.7-3.2 | 1.7   | 1.2-2.5 |
| Underweight (Total N=2 210)   | 1.3   | 0.8-2.0 | 1.5   | 0.9-2.5 | 1.4  | 0.7-2.8 | 1.8   | 0.8-4.1 | 1.2   | 0.7-2.2 | 1.4   | 0.7-2.5 |
| Overweight (Total N=2 210)    | 1.7   | 1.3-2.3 | 1.9   | 1.4-2.7 | 1.6  | 1.0-2.6 | 2.0   | 1.1-3.4 | 1.7   | 1.2-2.6 | 1.8   | 1.2-2.8 |
| Obesity (Total N=2 210)       | 1.9   | 1.0-3.4 | 1.5   | 0.8-3.1 | 0.7  | 0.2-2.3 | 0.6   | 0.1-2.5 | 3.7   | 1.7-8.0 | 3.1   | 1.2-7.7 |
| <b>Lifestyle factors</b>      |       |         |       |         |      |         |       |         |       |         |       |         |
| Early alcohol intoxication(s) | 1.7   | 1.3-2.2 | 1.2   | 0.8-1.6 | 2.1  | 1.4-3.2 | 1.5   | 0.9-2.4 | 1.5   | 1.1-2.1 | 1.0   | 0.6-1.5 |
| Physical activity             | 0.7   | 0.5-0.9 | 0.7   | 0.5-0.9 | 0.7  | 0.5-0.9 | 0.6   | 0.4-0.9 | 0.8   | 0.6-1.1 | 0.7   | 0.5-1.1 |
| Daily or occasional smoking   | 2.1   | 1.5-2.8 | 1.5   | 1.0-2.3 | 2.1  | 1.2-3.5 | 1.0   | 0.5-2.0 | 2.0   | 1.3-2.9 | 1.9   | 1.2-3.1 |

1  
2  
3  
4  
5  
6  
7  
8 OR\* Odds ratio adjusted for age  
9

10 aOR\*\* Odds Ratio adjusted for age, anxiety/depressive symptoms, attention problems, conduct problems, insomnia, pain/tension problems, physical activity,  
11 alcohol intoxications and smoking.  
12  
13  
14  
15  
16  
17  
18  
19  
20  
21  
22  
23  
24  
25  
26  
27  
28  
29  
30  
31  
32  
33  
34  
35  
36  
37  
38  
39  
40  
41  
42  
43  
44  
45  
46  
47  
48  
49

1  
2  
3  
4  
5  
6  
7  
8  
9  
10  
11  
12  
13  
14  
15  
16  
17  
18  
19  
20  
21  
22  
23  
24  
25  
26  
27  
28  
29  
30  
31  
32  
33  
34  
35  
36  
37  
38  
39  
40  
41  
42  
43  
44  
45  
46  
47  
48  
49

Table 3. Binary logistic regression; associations of frequencies of alcohol intoxications at baseline 1995-97 with suicidal ideation at follow-up in 2000-01. OR from single input age adjusted models, and adjusted OR (aOR) from fully adjusted models

|                     | Total |         |       |         | Boys |         |       |         | Girls |         |       |         |
|---------------------|-------|---------|-------|---------|------|---------|-------|---------|-------|---------|-------|---------|
|                     | OR*   | 95%CI   | aOR** | 95%CI   | OR*  | 95%CI   | aOR** | 95%CI   | OR*   | 95%CI   | aOR** | 95%CI   |
| No early alc. intox | 1     |         | 1     |         | 1    |         | 1     |         | 1     |         | 1     |         |
| 1-3 alc. intox      | 1.5   | 1.1-2.0 | 1.1   | 0.8-1.6 | 1.7  | 1.1-2.8 | 1.3   | 0.8-2.3 | 1.3   | 0.9-1.9 | 0.9   | 0.6-1.5 |
| >4 alc. intox       | 1.9   | 1.3-2.7 | 1.3   | 0.8-2.1 | 2.5  | 1.4-4.4 | 1.8   | 0.9-2.6 | 1.5   | 1.0-2.5 | 1.1   | 0.6-2.0 |

OR\* Odds ratio adjusted for age

aOR\*\* Odds Ratio adjusted for age, anxiety/depressive symptoms, attention problems, conduct problems, insomnia, pain/tension problems, physical activity and smoking.

## Contributorship statement

**Arve Strandheim:** primary author, formed the idea and method, analysed and wrote the draft, coordinated and finished the manuscript.

**Ottar Bjerkset:** contributed in developing the idea, background and writing of the manuscript.

**David Gunnell:** developing the idea with the corresponding author, supervision in choice of methods and background literature in addition to forming the writing of the article.

**Sigrid Bjørnelv:** developed the methods of age- and sex stratified weight variable, wrote most of the eating part of the article and commented generally in the development of the article.

**Turid Lingaas Holmen** PI of the Young HUNT study, method supervisor, but also generally taking part in forming the text.

**Niels Bentzen** Supervisor of the whole project. He was involved in development of ideas, writing and the general progress in the work with the article.

## Competing Interest

None of the authors declare any competing interests

## Funding

This article was funded as a part of a PhD project by a grant from the Liaison Committee between the Central Norwegian Health Authority and the Norwegian University of Science and Technology. In addition North-Trøndelag County has contributed to the project. The funding providers played no role in study design, analysis, interpretation, writing or submission of this article.

## Data sharing

Technical appendix, statistical details and dataset are accessible from the corresponding author. Extra data can be made available by e-mailing Young-HUNT PI, Professor Turid Lingaas Holmen, [turid.lingaas.holmen@ntnu.no](mailto:turid.lingaas.holmen@ntnu.no)

## Reference List

- (1) Fergusson DM, Lynskey MT. Suicide attempts and suicidal ideation in a birth cohort of 16-year-old New Zealanders. *J Am Acad Child Adolesc Psychiatry* 1995; 34(10):1308-1317.
- (2) Nock MK, Borges G, Bromet EJ, Alonso J, Angermeyer M, Beautrais A et al. Cross-national prevalence and risk factors for suicidal ideation, plans and attempts. *Br J Psychiatry* 2008; 192(2):98-105.
- (3) Ten HM, de GR, van DS, Verdurmen J, van 't LH, Vollebergh W et al. Incidence and course of suicidal ideation and suicide attempts in the general population. *Can J Psychiatry* 2009; 54(12):824-833.
- (4) Boden JM, Fergusson DM, Horwood LJ. Anxiety disorders and suicidal behaviours in adolescence and young adulthood: findings from a longitudinal study. *Psychol Med* 2007; 37(3):431-440.
- (5) Bradvik L, Mattisson C, Bogren M, Nettelblatt P. Long-term suicide risk of depression in the Lundby cohort 1947-1997--severity and gender. *Acta Psychiatr Scand* 2008; 117(3):185-191.
- (6) Brent DA. Risk factors for adolescent suicide and suicidal behavior: mental and substance abuse disorders, family environmental factors, and life stress. *Suicide Life Threat Behav* 1995; 25 Suppl:52-63.
- (7) Enns MW, Cox BJ, Afifi TO, de GR, Ten HM, Sareen J. Childhood adversities and risk for suicidal ideation and attempts: a longitudinal population-based study. *Psychol Med* 2006; 36(12):1769-1778.
- (8) Chronis-Tuscano A, Molina BS, Pelham WE, Applegate B, Dahlke A, Overmyer M et al. Very early predictors of adolescent depression and suicide attempts in children with attention-deficit/hyperactivity disorder. *Arch Gen Psychiatry* 2010; 67(10):1044-1051.
- (9) Evans E, Hawton K, Rodham K. Factors associated with suicidal phenomena in adolescents: a systematic review of population-based studies. *Clin Psychol Rev* 2004; 24(8):957-979.
- (10) Boden JM, Fergusson DM, Horwood LJ. Anxiety disorders and suicidal behaviours in adolescence and young adulthood: findings from a longitudinal study. *Psychol Med* 2007; 37(3):431-440.
- (11) Gunnell D, Harbord R, Singleton N, Jenkins R, Lewis G. Factors influencing the development and amelioration of suicidal thoughts in the general population. Cohort study. *Br J Psychiatry* 2004; 185:385-393.

- 1  
2  
3  
4  
5  
6  
7  
8  
9  
10  
11  
12  
13  
14  
15  
16  
17  
18  
19  
20  
21  
22  
23  
24  
25  
26  
27  
28  
29  
30  
31  
32  
33  
34  
35  
36  
37  
38  
39  
40  
41  
42  
43  
44  
45  
46  
47  
48  
49  
50  
51  
52  
53  
54  
55  
56  
57  
58  
59  
60
- (12) Bjerkeset O, Romundstad P, Evans J, Gunnell D. Association of adult body mass index and height with anxiety, depression, and suicide in the general population: the HUNT study. *Am J Epidemiol* 2008; 167(2):193-202.
  - (13) Carpenter KM, Hasin DS, Allison DB, Faith MS. Relationships between obesity and DSM-IV major depressive disorder, suicide ideation, and suicide attempts: results from a general population study. *Am J Public Health* 2000; 90(2):251-257.
  - (14) Crow S, Eisenberg ME, Story M, Neumark-Sztainer D. Are body dissatisfaction, eating disturbance, and body mass index predictors of suicidal behavior in adolescents? A longitudinal study. *J Consult Clin Psychol* 2008; 76(5):887-892.
  - (15) Wilcox HC, Conner KR, Caine ED. Association of alcohol and drug use disorders and completed suicide: an empirical review of cohort studies. *Drug Alcohol Depend* 2004; 76 Suppl:S11-S19.
  - (16) Borges G, Walters EE, Kessler RC. Associations of substance use, abuse, and dependence with subsequent suicidal behavior. *Am J Epidemiol* 2000; 151(8):781-789.
  - (17) Chatterji P, Dave D, Kaestner R, Markowitz S. Alcohol abuse and suicide attempts among youth. *Econ Hum Biol* 2004; 2(2):159-180.
  - (18) Roane BM, Taylor DJ. Adolescent insomnia as a risk factor for early adult depression and substance abuse. *Sleep* 2008; 31(10):1351-1356.
  - (19) Braden JB, Sullivan MD. Suicidal thoughts and behavior among adults with self-reported pain conditions in the national comorbidity survey replication. *J Pain* 2008; 9(12):1106-1115.
  - (20) Woolley SB, Fredman L, Goethe JW, Lincoln AK, Heeren T. Headache complaints and the risk of suicidal thoughts or behaviors. *J Nerv Ment Dis* 2008; 196(11):822-828.
  - (21) Bronisch T, Hofler M, Lieb R. Smoking predicts suicidality: findings from a prospective community study. *J Affect Disord* 2008; 108(1-2):135-145.
  - (22) Sagatun A, Sogaard AJ, Bjertness E, Selmer R, Heyerdahl S. The association between weekly hours of physical activity and mental health: a three-year follow-up study of 15-16-year-old students in the city of Oslo, Norway. *BMC Public Health* 2007; 7:155.
  - (23) Groholt B, Ekeberg O, Wichstrom L, Haldorsen T. Sex differences in adolescent suicides in Norway, 1990-1992. *Suicide Life Threat Behav* 1999; 29(4):295-308.
  - (24) Lewinsohn PM, Rohde P, Seeley JR, Baldwin CL. Gender differences in suicide attempts from adolescence to young adulthood. *J Am Acad Child Adolesc Psychiatry* 2001; 40(4):427-434.
  - (25) Cantor C, Neulinger K. The epidemiology of suicide and attempted suicide among young Australians. *Aust N Z J Psychiatry* 2000; 34(3):370-387.

- 1  
2  
3  
4  
5  
6  
7  
8  
9  
10  
11  
12  
13  
14  
15  
16  
17  
18  
19  
20  
21  
22  
23  
24  
25  
26  
27  
28  
29  
30  
31  
32  
33  
34  
35  
36  
37  
38  
39  
40  
41  
42  
43  
44  
45  
46  
47  
48  
49  
50  
51  
52  
53  
54  
55  
56  
57  
58  
59  
60
- (26) Heuveline P, Slap GB. Adolescent and young adult mortality by cause: age, gender, and country, 1955 to 1994. *J Adolesc Health* 2002; 30(1):29-34.
- (27) Boeninger DK, Masyn KE, Feldman BJ, Conger RD. Sex differences in developmental trends of suicide ideation, plans, and attempts among European American adolescents. *Suicide Life Threat Behav* 2010; 40(5):451-464.
- (28) Mather AA, Cox BJ, Enns MW, Sareen J. Associations of obesity with psychiatric disorders and suicidal behaviors in a nationally representative sample. *J Psychosom Res* 2009; 66(4):277-285.
- (29) Holmen TL, Bratberg G, Krokstad S, Langhammer A, Hveem K, Midthjell K et al. Cohort profile of the Young-HUNT Study, Norway: A population-based study of adolescents. *Int J Epidemiol* 2013.
- (30) Strandheim A, Holmen TL, Coombes L, Bentzen N. Alcohol intoxication and mental health among adolescents - a population review of 8983 young people, 13-19 years in North-Trondelag, Norway: the Young-HUNT Study. *Child Adolesc Psychiatry Ment Health* 2009; 3(1):18.
- (31) Strandheim A, Holmen TL, Coombes L, Bentzen N. Alcohol use and physical health in adolescence: a general population survey of 8,983 young people in North-Trondelag, Norway (the Young-HUNT study). *Subst Use Misuse* 2010; 45(1-2):253-265.
- (32) Pedersen G, Karterud S. Is SCL-90R helpful for the clinician in assessing DSM-IV symptom disorders? *Acta Psychiatr Scand* 2004; 110(3):215-224.
- (33) Tambs K, Moum T. How well can a few questionnaire items indicate anxiety and depression? *Acta Psychiatr Scand* 1993; 87(5):364-367.
- (34) Strand BH, Dalgard OS, Tambs K, Rognerud M. Measuring the mental health status of the Norwegian population: a comparison of the instruments SCL-25, SCL-10, SCL-5 and MHI-5 (SF-36). *Nord J Psychiatry* 2003; 57(2):113-118.
- (35) Storksen I, Roysamb E, Moum T, Tambs K. Adolescents with a childhood experience of parental divorce: a longitudinal study of mental health and adjustment. *J Adolesc* 2005; 28(6):725-739.
- (36) Storksen I, Roysamb E, Holmen TL, Tambs K. Adolescent adjustment and well-being: effects of parental divorce and distress. *Scand J Psychol* 2006; 47(1):75-84.
- (37) Neckelmann D, Mykletun A, Dahl AA. Chronic insomnia as a risk factor for developing anxiety and depression. *Sleep* 2007; 30(7):873-880.
- (38) Booth ML, Okely AD, Chey T, Bauman A. The reliability and validity of the physical activity questions in the WHO health behaviour in schoolchildren (HBSC) survey: a population study. *Br J Sports Med* 2001; 35(4):263-267.

- 1  
2  
3  
4  
5  
6  
7  
8  
9  
10  
11  
12  
13  
14  
15  
16  
17  
18  
19  
20  
21  
22  
23  
24  
25  
26  
27  
28  
29  
30  
31  
32  
33  
34  
35  
36  
37  
38  
39  
40  
41  
42  
43  
44  
45  
46  
47  
48  
49  
50  
51  
52  
53  
54  
55  
56  
57  
58  
59  
60
- (39) Bjornelv S, Lydersen S, Mykletun A, Holmen TL. Changes in BMI-distribution from 1966-69 to 1995-97 in adolescents. The Young-HUNT study, Norway. *BMC Public Health* 2007; 7:279.
- (40) Cole TJ, Flegal KM, Nicholls D, Jackson AA. Body mass index cut offs to define thinness in children and adolescents: international survey. *BMJ* 2007; 335(7612):194.
- (41) Strandheim A, Holmen TL, Coombes L, Bentzen N. Alcohol intoxication and mental health among adolescents - a population review of 8983 young people, 13-19 years in North-Trondelag, Norway: the Young-HUNT Study. *Child Adolesc Psychiatry Ment Health* 2009; 3(1):18.
- (42) Strandheim A, Bratberg GH, Holmen TL, Coombes L, Bentzen N. The influence of behavioural and health problems on alcohol and drug use in late adolescence - a follow up study of 2 399 young Norwegians. *Child Adolesc Psychiatry Ment Health* 2011; 5(1):17.
- (43) Engqvist U, Rydelius PA. Death and suicide among former child and adolescent psychiatric patients. *BMC Psychiatry* 2006; 6:51.
- (44) Harris EC, Barraclough B. Suicide as an outcome for mental disorders. A meta-analysis. *Br J Psychiatry* 1997; 170:205-228.
- (45) Glass K, Flory K, Martin A, Hankin BL. ADHD and comorbid conduct problems among adolescents: associations with self-esteem and substance use. *Atten Defic Hyperact Disord* 2011; 3(1):29-39.
- (46) Kirkcaldy BD, Siefen GR, Urkin J, Merrick J. Risk factors for suicidal behavior in adolescents. *Minerva Pediatr* 2006; 58(5):443-450.
- (47) Huh Y, Choi I, Song M, Kim S, Hong SD, Joung Y. A comparison of comorbidity and psychological outcomes in children and adolescents with attention-deficit/hyperactivity disorder. *Psychiatry Investig* 2011; 8(2):95-101.
- (48) Rutter M. Research review: Child psychiatric diagnosis and classification: concepts, findings, challenges and potential. *J Child Psychol Psychiatry* 2011; 52(6):647-660.
- (49) Brunner J, Bronisch T, Pfister H, Jacobi F, Hofler M, Wittchen HU. High cholesterol, triglycerides, and body-mass index in suicide attempters. *Arch Suicide Res* 2006; 10(1):1-9.
- (50) Galaif ER, Sussman S, Newcomb MD, Locke TF. Suicidality, depression, and alcohol use among adolescents: a review of empirical findings. *Int J Adolesc Med Health* 2007; 19(1):27-35.
- (51) Barry AE, Piazza-Gardner AK. Drunkorexia: understanding the co-occurrence of alcohol consumption and eating/exercise weight management behaviors. *J Am Coll Health* 2012; 60(3):236-243.

- 1  
2  
3  
4  
5  
6  
7  
8  
9  
10  
11  
12  
13  
14  
15  
16  
17  
18  
19  
20  
21  
22  
23  
24  
25  
26  
27  
28  
29  
30  
31  
32  
33  
34  
35  
36  
37  
38  
39  
40  
41  
42  
43  
44
- (52) Buscemi J, Martens MP, Murphy JG, Yurasek AM, Smith AE. Moderators of the relationship between physical activity and alcohol consumption in college students. *J Am Coll Health* 2011; 59(6):503-509.
- (53) Kwan MY, Cairney J, Faulkner GE, Pullenayegum EE. Physical activity and other health-risk behaviors during the transition into early adulthood: a longitudinal cohort study. *Am J Prev Med* 2012; 42(1):14-20.
- (54) Bratberg GH, Nilsen TI, Holmen TL, Vatten LJ. Sexual maturation in early adolescence and alcohol drinking and cigarette smoking in late adolescence: a prospective study of 2,129 Norwegian girls and boys. *Eur J Pediatr* 2005; 164(10):621-625.
- (55) Glowinski AL, Bucholz KK, Nelson EC, Fu Q, Madden PA, Reich W et al. Suicide attempts in an adolescent female twin sample. *J Am Acad Child Adolesc Psychiatry* 2001; 40(11):1300-1307.
- (56) Mykletun A, Bjerkeset O, Dewey M, Prince M, Overland S, Stewart R. Anxiety, depression, and cause-specific mortality: the HUNT study. *Psychosom Med* 2007; 69(4):323-331.
- (57) Bjerkeset O, Mykletun A, Dahl AA, Linaker O. Mortality in relation to self-reported mixed anxiety and depression symptoms--The HUNT study. *Nord J Psychiatry* 2007; 61(1):6-11.
- (58) Nordentoft M. Prevention of suicide and attempted suicide in Denmark. Epidemiological studies of suicide and intervention studies in selected risk groups. *Dan Med Bull* 2007; 54(4):306-369.

#### 45 **Acknowledgments:**

46  
47 The Nord-Trøndelag Health Study (The HUNT Study) is collaboration between HUNT  
48  
49 Research Centre (Faculty of Medicine, Norwegian University of Science and  
50  
51 Technology NTNU), Nord-Trøndelag County Council, Central Norway Health  
52  
53 Authority, and the Norwegian Institute of Public Health.  
54  
55  
56  
57  
58  
59  
60

STROBE Statement—checklist of items that should be included in reports of observational studies  
*My responses are marked by X= checked (AS)*

|                              | Item No | Recommendation                                                                                                                                                                         |
|------------------------------|---------|----------------------------------------------------------------------------------------------------------------------------------------------------------------------------------------|
| <b>Title and abstract</b>    | 1       | (a) X Indicate the study's design with a commonly used term in the title or the abstract                                                                                               |
|                              |         | (b) X Provide in the abstract an informative and balanced summary of what was done and what was found                                                                                  |
| <b>Introduction</b>          |         |                                                                                                                                                                                        |
| Background/rationale         | 2       | X Explain the scientific background and rationale for the investigation being reported                                                                                                 |
| Objectives                   | 3       | X State specific objectives, including any prespecified hypotheses                                                                                                                     |
| <b>Methods</b>               |         |                                                                                                                                                                                        |
| Study design                 | 4       | X Present key elements of study design early in the paper                                                                                                                              |
| Setting                      | 5       | X Describe the setting, locations, and relevant dates, including periods of recruitment, exposure, follow-up, and data collection                                                      |
| Participants                 | 6       | (a) X <i>Cohort study</i> —Give the eligibility criteria, and the sources and methods of selection of participants. Describe methods of follow-up                                      |
|                              |         | (b)                                                                                                                                                                                    |
| Variables                    | 7       | X Clearly define all outcomes, exposures, predictors, potential confounders, and effect modifiers. Give diagnostic criteria, if applicable                                             |
| Data sources/<br>measurement | 8*      | X For each variable of interest, give sources of data and details of methods of assessment (measurement). Describe comparability of assessment methods if there is more than one group |
| Bias                         | 9       | X Describe any efforts to address potential sources of bias                                                                                                                            |
| Study size                   | 10      | X Explain how the study size was arrived at                                                                                                                                            |
| Quantitative variables       | 11      | X Explain how quantitative variables were handled in the analyses. If applicable, describe which groupings were chosen and why                                                         |
| Statistical methods          | 12      | (a) X Describe all statistical methods, including those used to control for confounding                                                                                                |
|                              |         | (b) X Describe any methods used to examine subgroups and interactions                                                                                                                  |
|                              |         | (c) X Explain how missing data were addressed                                                                                                                                          |

Continued on next page

**Results**

|                          |     |                                                                                                                                                                                                                                                                                                                           |
|--------------------------|-----|---------------------------------------------------------------------------------------------------------------------------------------------------------------------------------------------------------------------------------------------------------------------------------------------------------------------------|
| Participants             | 13* | (a) X Report numbers of individuals at each stage of study—eg numbers potentially eligible, examined for eligibility, confirmed eligible, included in the study, completing follow-up, and analysed                                                                                                                       |
| Descriptive data         | 14* | (a) X Give characteristics of study participants (eg demographic, clinical, social) and information on exposures and potential confounders<br>(b) X Indicate number of participants with missing data for each variable of interest<br>(c) X <i>Cohort study</i> —Summarise follow-up time (eg, average and total amount) |
| Outcome data             | 15* | X <i>Cohort study</i> —Report numbers of outcome events or summary measures over time                                                                                                                                                                                                                                     |
| Main results             | 16  | (a) X Give unadjusted estimates and, if applicable, confounder-adjusted estimates and their precision (eg, 95% confidence interval). Make clear which confounders were adjusted for and why they were included<br>(b) X Report category boundaries when continuous variables were categorized<br>(c)                      |
| Other analyses           | 17  | X Report other analyses done—eg analyses of subgroups and interactions, and sensitivity analyses                                                                                                                                                                                                                          |
| <b>Discussion</b>        |     |                                                                                                                                                                                                                                                                                                                           |
| Key results              | 18  | X Summarise key results with reference to study objectives                                                                                                                                                                                                                                                                |
| Limitations              | 19  | X Discuss limitations of the study, taking into account sources of potential bias or imprecision. Discuss both direction and magnitude of any potential bias                                                                                                                                                              |
| Interpretation           | 20  | X Give a cautious overall interpretation of results considering objectives, limitations, multiplicity of analyses, results from similar studies, and other relevant evidence                                                                                                                                              |
| Generalisability         | 21  | X Discuss the generalisability (external validity) of the study results                                                                                                                                                                                                                                                   |
| <b>Other information</b> |     |                                                                                                                                                                                                                                                                                                                           |
| Funding                  | 22  | X Give the source of funding and the role of the funders for the present study and, if applicable, for the original study on which the present article is based                                                                                                                                                           |

\*Give information separately for cases and controls in case-control studies and, if applicable, for exposed and unexposed groups in cohort and cross-sectional studies.

**Note:** An Explanation and Elaboration article discusses each checklist item and gives methodological background and published examples of transparent reporting. The STROBE checklist is best used in conjunction with this article (freely available on the Web sites of PLoS Medicine at <http://www.plosmedicine.org/>, Annals of Internal Medicine at <http://www.annals.org/>, and Epidemiology at <http://www.epidem.com/>). Information on the STROBE Initiative is available at [www.strobe-statement.org](http://www.strobe-statement.org).

# BMJ Open

## Risk factors for suicidal thoughts in adolescence – a prospective cohort study -The Young-HUNT study.

|                                 |                                                                                                                                                                                                                                                                                                                                                                                                                                                                         |
|---------------------------------|-------------------------------------------------------------------------------------------------------------------------------------------------------------------------------------------------------------------------------------------------------------------------------------------------------------------------------------------------------------------------------------------------------------------------------------------------------------------------|
| Journal:                        | <i>BMJ Open</i>                                                                                                                                                                                                                                                                                                                                                                                                                                                         |
| Manuscript ID:                  | bmjopen-2014-005867.R1                                                                                                                                                                                                                                                                                                                                                                                                                                                  |
| Article Type:                   | Research                                                                                                                                                                                                                                                                                                                                                                                                                                                                |
| Date Submitted by the Author:   | 24-Jul-2014                                                                                                                                                                                                                                                                                                                                                                                                                                                             |
| Complete List of Authors:       | Strandheim, Arve; Norwegian University of Science and Technology (NTNU), HUNT research centr; Sykehuset Levanger, Child and adolescent psychiatry<br>Bjerkeset, Ottar; Høgskolen i Nord-Trøndelag, helsefag<br>Gunnell, DJ; University of Bristol, Social Medicine<br>Bjørnelv, Sigrid; NTNU, INM<br>Holmen, Turid; Norwegian University of Science and Technology, HUNT research Center, Department of Public Health and General Practice<br>Bentzen, Niels; NTNU, ISM |
| <b>Primary Subject Heading</b>: | Public health                                                                                                                                                                                                                                                                                                                                                                                                                                                           |
| Secondary Subject Heading:      | Epidemiology, Paediatrics                                                                                                                                                                                                                                                                                                                                                                                                                                               |
| Keywords:                       | Child & adolescent psychiatry < PSYCHIATRY, Suicide & self-harm < PSYCHIATRY, PREVENTIVE MEDICINE, Substance misuse < PSYCHIATRY                                                                                                                                                                                                                                                                                                                                        |
|                                 |                                                                                                                                                                                                                                                                                                                                                                                                                                                                         |

SCHOLARONE™  
Manuscripts

Only

1  
2  
3  
4  
5  
6  
7  
8  
9  
10  
11  
12  
13  
14  
15  
16  
17  
18  
19  
20  
21  
22  
23  
24  
25  
26  
27  
28  
29  
30  
31  
32  
33  
34  
35  
36  
37  
38  
39  
40  
41  
42  
43  
44  
45  
46  
47  
48  
49  
50  
51  
52  
53  
54  
55  
56  
57  
58  
59  
60

# Risk factors for suicidal thoughts in adolescence – a prospective cohort study - The Young-HUNT study.

\*Arve Strandheim<sup>1, 2, 3</sup>, Ottar Bjerkeset<sup>4, 5</sup>, David Gunnell<sup>6</sup>, Sigrid Bjørnelv<sup>4, 7</sup>, Turid  
Lingaas Holmen<sup>2, 3</sup>, Niels Bentzen<sup>2</sup>

\*corresponding author: arve.strandheim@ntnu.no

1) Department of Child and Adolescent Psychiatry, Levanger Hospital, Nord-Trøndelag Health Trust,  
Norway

2) Department of Public Health and General Practice, the Faculty of Medicine (ISM), Norwegian  
University of Science and Technology (NTNU)

3) HUNT research centre, Department of Public Health and General Practice, Faculty of Medicine,  
NTNU

4

4) Faculty of Health Sciences, Nord-Trøndelag University College (HiNT), Levanger, Norway

5) Department of Neuroscience, Faculty of Medicine, Norwegian University of Science and  
Technology, Trondheim, Norway

6) School of Social and Community Medicine, University of Bristol, UK

7) Department of Psychiatry, Levanger Hospital, Nord-Trøndelag Health Trust, Norway

Word count: 5833

None of the authors declare any conflict of interest

1  
2  
3  
4  
5  
6  
7  
8  
9  
10  
11  
12  
13  
14  
15  
16  
17  
18  
19  
20  
21  
22  
23  
24  
25  
26  
27  
28  
29  
30  
31  
32  
33  
34  
35  
36  
37  
38  
39  
40  
41  
42  
43  
44  
45  
46  
47  
48  
49  
50  
51  
52  
53  
54  
55  
56  
57  
58  
59  
60

## ABSTRACT

**Objectives:** Examining the associations between health- and lifestyle factors recorded in the participants' early teens, and development of suicidal thoughts recorded 4 years later

**Design:** Population based prospective cohort study.

**Settings:** All students in the two relevant year classes in Nord-Trøndelag County were invited, 80% attended both waves of data collection.

**Participants:** 2 399 secondary school students who participated in the Young-Hunt 1 study in 1995-1997 (13-15 years old) were included in a follow-up study 4 years later (17-19 years old).

**Primary outcome measure:** Suicidal thoughts reported at age 17-19 years.

**Results:** 408 (17%, 95%Confidence Interval (CI) 15.5-18.5) of the adolescents reported suicidal thoughts at follow up, 158 (14.2%, CI 13.6-16.4) boys and 250 (19.5%, CI 18.8-22.0) girls. Baseline anxiety and depressive symptoms (adjusted Odds Ratio (aOR) 1.9, CI 1.4-2.6), conduct problems (aOR 1.8, CI 1.3-2.6), overweight (aOR 1.9 CI 1.4-2.4), and muscular pain and tension (aOR 1.8, CI 1.4-2.4), were all associated with reporting suicidal thoughts at follow up.

**Conclusion:** One in six young adults experienced suicidal thoughts, girls predominating. Suicidal thoughts were most strongly associated with symptoms of anxiety/depression, conduct problems, pain/tension and overweight reported when participants were 13-15 years old. Specific preventive efforts in these groups might be indicated. Future research should investigate whether similar associations are seen with suicide/suicidal attempts as endpoints.

**Strengths and limitations of this study.**

- Whole county cohort study with follow up after 4 years
- Exposure variables: behaviour/health traits, outcome: suicidal thoughts
- Suicidal thought were prevalent in late adolescence, boys 14.2%, girls 19.5%
- Suicidal thought were associated with anxiety/depression, conduct problem, pain/tension and overweight in early adolescence

## INTRODUCTION

Suicidal thoughts and suicidal behaviours develop during adolescence and peak late in adolescence and early adulthood<sup>1</sup>. Recent findings from population based studies indicate that suicidal thoughts and attempts are parts of a continuum and share a common risk profile<sup>2;3</sup>. It is well known from general population studies that anxiety and depression contribute to raised suicide risk<sup>4;4-6</sup>, yet some prospective studies have also linked anxiety and depression to increased incidence of suicidal thoughts<sup>3;7-9</sup>. In adolescence, externalizing disorders like ADHD and Conduct Disorders have been associated with suicidal attempts, and to a lesser extent suicidal thoughts<sup>10;11</sup>. Further, there is empirical support that childhood adversities, such as low social support, sexual abuse, domestic violence and maternal depression, influence the development of suicidal thoughts during adolescence<sup>4;7;12;13</sup>. The findings from studies on weight problems, both under- and overweight, and suicidal thoughts are contradictory, but overweight is often reported as a risk factor among adults<sup>14-16</sup>. Even though adult alcohol problems contributes to a ten-fold increase in suicide related mortality<sup>17</sup>, the relationship between alcohol use and suicidal thoughts in adolescence is sparsely studied the last decade<sup>18;19</sup>. Further, sleep disturbance<sup>20</sup>, pain, especially headache<sup>21;22</sup>, smoking and reduced physical activity<sup>23-25</sup> all have been reported to have a positive association with suicidal ideation in the adolescent general population.

Complex and partly paradoxical finding on gender differences complicate the understanding of adolescence suicidal ideation and behaviour. While girls report suicidal thoughts more often than boys during adolescence<sup>26;27</sup>, completed suicide in adolescence and young adulthood is 3 to 4 times more common in males than

1  
2  
3  
4 females in the Western World <sup>26;28;29</sup>. The prevalence of suicidal thoughts among girls  
5  
6 peaks about 16 years of age, while it continues to increase beyond the age of 19 in  
7  
8 boys <sup>30</sup>. Intriguingly, in adults overweight may be protective of suicide among males  
9  
10 and a risk factor among females in the general population <sup>15;31</sup>.

11  
12 However, few large scale prospective studies have examined a wide range of risk-  
13  
14 and protective factors for suicidal thoughts among adolescent boys and girls.

15  
16 The aim of this exploratory population study was to investigate the association of  
17  
18 different risk factors in early adolescence with the development of suicidal thoughts 4  
19  
20 years later.. Based on existing literature we hypothesized that girls, individuals with  
21  
22 high levels of anxiety and depression, inattentiveness, conduct problems, and  
23  
24 alcohol-intoxications at baseline would be at increased risk of suicidal thoughts at  
25  
26 follow-up.  
27  
28  
29  
30  
31  
32  
33  
34  
35  
36  
37  
38  
39  
40  
41  
42  
43  
44  
45  
46  
47  
48  
49  
50  
51  
52  
53  
54  
55  
56  
57  
58  
59  
60

## METHOD

### Study design, setting and participants

Young-HUNT 1, the first wave of the adolescent part of the HUNT study (Nord-Trøndelag Health Study) (<http://www.ntnu.no/hunt/english>)<sup>32</sup>, took place between 1995 and 1997. All teenagers (13-19 years) attending secondary and high schools in the county were invited to participate and 90% attended. In Young-HUNT 2, (2000-2001) students in the last two years of high school or vocational training (age 17- 19) were invited; of these 2 399 (80%) attended both Young-HUNT 1 and 2. The mean follow-up time was 3.9 years.

Both at baseline and follow-up, the participants completed a self-report questionnaire in class and underwent a physical examination; including height and weight.

All 2 399 students who took part in both Young-HUNT 1 and 2 were included in the present study, but analyses of associations with weight are based on the 2 271 participants who took part in the clinical examination.

### Ethics

All the potential participants and their parents received a written statement about the study one month prior to the collection of the data, making a discussion possible before signing the consent. Voluntary participation was stressed both to the adolescents and their parents.

### Measures

1  
2  
3  
4 The Young-HUNT questionnaire includes a broad spectrum of health related  
5 variables relevant for this study (<http://www.ntnu.edu/hunt/data/que>). Some  
6  
7  
8  
9  
10  
11  
12  
13  
14  
15  
16  
17  
18  
19  
20  
21  
22  
23  
24  
25  
26  
27  
28  
29  
30  
31  
32  
33  
34  
35  
36  
37  
38  
39  
40  
41  
42  
43  
44  
45  
46  
47  
48  
49  
50  
51  
52  
53  
54  
55  
56  
57  
58  
59  
60

The Young-HUNT questionnaire includes a broad spectrum of health related variables relevant for this study (<http://www.ntnu.edu/hunt/data/que>). Some categorical variables were already dichotomized, other variables (as anxiety and depressive symptoms, attention- and conduct problems, pain and tension symptoms) were based on instruments with multiple sub-questions and alternative answers.; categorisation of responses to these questions was based on factor analysis, described in earlier studies <sup>33;34</sup>.

#### Outcome measure at follow-up

##### Suicidal thoughts

At follow up the students were asked: "Have you had thoughts about taking your own life?" (yes/no). Positive responses were labelled as suicidal thoughts.

#### Exposure variables at baseline

##### Anxiety and depressive symptoms

Derived from the Symptom Check List 90 R <sup>35</sup>, an abbreviated and previously validated five item scale, SCL-5 <sup>36;37</sup>, was integrated in the questionnaire.

According to previous studies <sup>38</sup> and to our factor analysis, we included all five items in our variable.

##### Attention- and conduct problems

A 14-item school-adjustment questionnaire was included in Young-HUNT, described in previous studies <sup>33;39</sup>, was utilised to define attention- and conduct variables. A factor analysis identified two separate factors; attention problems and conduct

1  
2  
3  
4 problems. Conduct problems include disagreement with teacher, such as quarrels  
5 and scolding, as well as involvement in fights at school; attention problems include  
6 both inattention and hyperkinetic symptoms. The summarized scores of all items in  
7 each category were dichotomised into low or high scores; defining scores above the  
8 70 percentile for the study population as high.  
9  
10  
11  
12  
13  
14

#### 15 16 17 18 Pain and tension symptoms

19 The following 4 items constituted the pain/tension variable: headache, neck pain,  
20 muscle and joint pain and palpitations the last 12 months. The values were  
21 dichotomized according to the 70<sup>th</sup> percentile, defining students with score above as  
22 high<sup>34</sup>.  
23  
24  
25  
26  
27  
28  
29  
30

#### 31 Alcohol use

32 Baseline alcohol status was defined using number of reported alcohol intoxications.  
33 The students answered the question: "Have you ever been drunk". The variable were  
34 dichotomized to "never" or "ever", and named "early alcohol intoxication". For further  
35 differentiation early alcohol intoxications were divided in three; none, 1-3, 4 and more  
36 (table 3).  
37  
38  
39  
40  
41  
42  
43  
44  
45

#### 46 Smoking

47 Smoking at baseline was assessed using the question: "Do you smoke?" (yes/no).  
48 Current smoking was defined as "yes" to smoking daily or occasionally.  
49  
50  
51  
52  
53  
54

#### 55 Sleep disturbance

56  
57  
58  
59  
60

1  
2  
3  
4 Baseline sleep disturbance was defined as difficulties initiating sleep (DIS); “In the  
5 last month, have you had difficulty falling asleep?”. “Almost every night” and “often”  
6 were classified as insomnia in accordance with former research <sup>40</sup>.  
7  
8  
9  
10

### 11 Physical activity

12  
13 Level of physical activity at baseline was estimated using the question: “With  
14 exception of school activity, how many days a week do you practice sports or  
15 exercise to the point where you breathe heavily and/or sweat?”. “Four days a week or  
16 more” was classified as being regular physically active <sup>41</sup>.  
17  
18  
19  
20  
21  
22  
23  
24

### 25 Height and weight

26  
27 Height and weight were measured by especially trained nurses to the nearest  
28 centimetre, respectively nearest half kilogram with light clothes, without shoes, jacket  
29 or outdoor garments. Body mass index <sup>42</sup> was calculated as body weight (kg) divided  
30 by the square value of height (m). Using the age- and gender-specific BMI-cut-offs  
31 for children and adolescents recommended by the International Obesity Task Force  
32 underweight was defined corresponding to BMI 18.5 kg per metre squared or less in  
33 adults <sup>43</sup>. Overweight was defined using age- and gender-specific BMI-cut-offs  
34 corresponding to BMI interval between 25 and 30 in adults and obese were defined  
35 with cut offs corresponding to BMI 30 and beyond in adults.  
36  
37  
38  
39  
40  
41  
42  
43  
44  
45  
46  
47  
48  
49  
50  
51  
52

### 53 Statistics

54  
55 PASW Statistics 18 was used for data analysis. Frequencies are given as  
56 percentages and 95% Confidence Intervals for proportions were included for  
57  
58  
59  
60

1  
2  
3  
4 comparison. Logistic regression was the main statistical analysis in the study,  
5  
6 presenting result as odds ratios (OR) with 95% Confidence interval (CI).  
7  
8

9 In the main analysis, univariable logistic regression analyses were first used to  
10  
11 examine the crude associations between the health and behavioural exposures with  
12  
13 suicidal ideation at follow up. Results were stratified on gender, adjustment only  
14  
15 made for age. Then all the variables were entered in the same models stratified by  
16  
17 gender (Table 2), thus adjusting for each other in addition to age. The fully adjusted  
18  
19 models in this study include only participants that both completed all the variables  
20  
21 used from the questionnaire and had participated in the clinical examination, giving a  
22  
23 total number of completers of 1 911 in these models.  
24  
25  
26  
27  
28

29 According to results from former studies using the Young –HUNT dataset <sup>34,45</sup>,  
30  
31 several clinically relevant statistical interactions were tested for. In the present study  
32  
33 interactions were shown between gender and overweight ( $p=0.01$ ), possible  
34  
35 interactions also between gender and anxiety/depressive symptoms ( $p=0.09$ ), pain  
36  
37 and tension ( $p=0.10$ ) and early alcohol intoxication ( $p=0.09$ ). Accordingly, all  
38  
39 analyses were stratified by gender (Table 2). Further, there were possible  
40  
41 interactions shown between early alcohol intoxication and anxiety/depressive  
42  
43 symptoms ( $p= 0.07$ ) or physical activity ( $p=0.05$ ) analysing for suicidal thoughts. To  
44  
45 control for these potential interactions, analysis stratified on the presence of early  
46  
47 alcohol intoxication were conducted, but only gave modest effect on the ORs and are  
48  
49 not shown here.  
50  
51  
52  
53  
54  
55  
56  
57  
58  
59  
60

## RESULTS

Altogether 2 399 students (80 % of the eligible) completed the questionnaire in both waves of the study, 1 115 boys (46.5%) and 1 284 girls. 2 271 students answered the question on suicidal thoughts at follow-up; 408 students (17%) reported having had suicidal thoughts, and the prevalence was 14.2% (CI 13.6-16.4) in boys and 19.5% (CI 18.8-22.0) in girls.

At baseline symptoms of anxiety and depression were more frequent among girls (21.0%, CI 18.8-23.2), than boys (11.5%, CI 9.6-13.4) (Table 1), as was daily or occasional smoking: girls (12.1%, CI 10.3-13.9), boys (7.8%, CI 6.2-9.4). Conduct problems were more frequent among boys (16.2 %, CI 14.4-18.4), than girls (5.3%, CI 4.1-6.5) and more boys were physically active (35.6%, CI 32.8-38.4), compared to girls (23.4%, CI 21.1-25.7).

Table 1 inserted here

In the univariable age adjusted models (Table 2), anxiety and depressive symptoms, attention- and conduct problems, insomnia, pain/tension problems and smoking at baseline more than doubled the odds for suicidal thoughts at follow-up in both genders. Alcohol intoxication and overweight at baseline had moderate effects on suicidal thoughts (50-70% increase) in both genders (Table 2), whereas underweight did not show an influence on suicidal ideation in this study. Physical activity 4-7 days a week had a protective effect (OR: 0.7, CI 0.5-0.9), whereas smoking at baseline increased odds for suicidal thoughts 4 years later (OR 2.1, CI 1.5-2.8).

Table 2 inserted here

1  
2  
3  
4  
5  
6  
7 In the fully adjusted model stratified by gender, anxiety and depressive symptoms  
8 (aOR 1.9, CI 1.4-2.6), together with pain and tension problems (aOR 1.8, CI 1.4-2.4)  
9 still seemed strongly associated with later suicidal ideation, especially among boys.  
10  
11 Conduct problems also remained robustly associated to suicidal thoughts (aOR 1.8,  
12  
13 CI 1.3-2.6) after adjustment. The association with overweight was strengthened (aOR  
14  
15 1.9, CI 1.4-2.7), with a robust relationship demonstrated also even among boys (aOR  
16  
17 2.0, CI 1.1-3.4). In contrast; obesity was strongly associated with suicidal thoughts  
18  
19 only among girls (aOR 3.1, CI 1.2-7.7). Further, smoking was associated with suicidal  
20  
21 thoughts, specifically among girls (aOR 1.9, CI 1.2-3.1).  
22  
23  
24  
25

26  
27 The effect of early alcohol intoxications on crude OR for suicidal thoughts weakened  
28  
29 in models controlling for other variables; controlling for smoking in particular  
30  
31 attenuated the strength of the associations. Such effects were also seen when the  
32  
33 association with alcohol was investigated across 3 levels of increasing exposure  
34  
35 (Table 3). Attention problems, insomnia and early alcohol intoxications did not show  
36  
37 statistically significant associations with suicidal thought in the fully integrated model.  
38  
39

40 Table 3 inserted here

41  
42 The protective effect of physical activity was evident among boys (aOR 0.6 CI 0.4-  
43  
44 0.9) but not significantly among girls (aOR 0.7 CI 0.5-1.1). Further stratified analyses  
45  
46 showed that the protective association was evident in the group not reporting early  
47  
48 alcohol intoxication(s) (OR 0.6, CI 0.4-0.8), compared to the group with early  
49  
50 intoxication (OR 1.0, CI 0.6-1.6).  
51  
52  
53  
54  
55  
56  
57  
58  
59  
60

## DISCUSSION

Anxiety and depressive symptoms, together with pain and muscular tension, were associated with nearly doubled increased risk for development of suicidal thoughts during adolescence; and more so in boys than girls. Attention problems also had a similar unadjusted effect, which we suspect might be mediated through other health problems, like depression, visualized by reduced OR after adjustment in our analysis.

In accordance with previous suicide-research<sup>46;47</sup>, we found that conduct problems robustly increased the odds for suicidal thoughts in both genders. Conduct problems as well as conduct disorder emerge early in child development, and include some degree of impulsivity, frustration, poor academic achievement, social marginalization and often low self-esteem<sup>48</sup>, all previously linked to suicidal behaviours and suicide<sup>49</sup>. Using diagnostic categories, co-morbidity in conduct disorder is common, especially with attention and hyperactivity disorders<sup>50;51</sup>. Features that are specific for (e.g. social reaction on rule breaking behaviour), and features that commonly occur within attention- and conduct problems (as impulsivity), can be basis for development of suicidality. The link might also be mediated through development of depressive symptoms around puberty. However, our broad category of conduct problems seems robustly associated with suicidal thoughts even after controlling for depression and other possible confounders.

The observation that boys seemed more vulnerable to anxiety and depressive symptoms, is in accordance with a previous study on adolescents with major depressive disorder<sup>27</sup>. The gender differences in findings may be related to the fact that depressive states are less frequent among boys, or might be reported by boys

1  
2  
3  
4 with more serious problems, thus representing a more extreme sample. The  
5  
6  
7  
8  
9  
10  
11  
12  
13  
14  
15  
16  
17  
18  
19  
20  
21  
22  
23  
24  
25  
26  
27  
28  
29  
30  
31  
32  
33  
34  
35  
36  
37  
38  
39  
40  
41  
42  
43  
44  
45  
46  
47  
48  
49  
50  
51  
52  
53  
54  
55  
56  
57  
58  
59  
60

with more serious problems, thus representing a more extreme sample. The  
dissimilarity may also be due to different underlying causes, and the stigma of  
anxiety and depression may be more socially excluding among boys than girls<sup>27</sup>.  
Muscular pain and tension were formerly<sup>21</sup> thought to be mediated through mental  
health problems. Our findings were, however, robust to adjustment, including anxiety  
and depression, and merits further study.

In relation to weight/BMI, the literature indicates that the epidemiology and  
mechanisms of suicide ideation and suicide attempts differ from those leading to a  
completed suicide<sup>14</sup>. Consistently, population based studies of adults have  
demonstrated a negative association of BMI with risk of completed suicide. In  
contrast, and in line with our findings among girls, several studies have demonstrated  
an increased risk of suicidal ideation and suicide attempts in the obese<sup>15;52</sup>.  
Overweight might be less socially accepted in girls compared to boys, and body  
image perspective more dominant. Due to an earlier onset of puberty, girls were  
physically more mature than boys at baseline, and this difference might have  
influenced our results.

Alcohol use disorders are frequently recorded in studies of completed suicide<sup>53</sup>, yet  
our findings show a marginal association of early alcohol intoxications and  
development of suicidal thoughts. Alcohol intoxications at baseline might not  
represent an ideal measure to link early alcohol use to later suicidal ideation. Binge  
drinking is a common social activity among Norwegian teenagers, and might involve  
both protective and risk-inducing factors. For instance, adolescents not drinking at all  
might be more lonely and isolated. Alcohol intoxication might initialize an impulsive

1  
2  
3  
4 attempt rather than generating suicidal thoughts. In addition early alcohol  
5 involvement can act as a modifier on other risk factors. Additional analysis in our  
6 study confirmed that early alcohol intoxication nearly doubled the effect  
7 anxiety/depressive symptoms had on suicidal ideation.  
8  
9  
10  
11  
12  
13

14  
15 Smoking increased odds for suicidal thoughts in our study, but was heavily correlated  
16 with early alcohol intoxication. Of the 244 adolescents reporting smoking at baseline  
17 199 (82%) also reported early alcohol intoxications. Both alcohol use and smoking  
18 can be perceived as experimental and deviant behaviour among persons under 16.  
19 They tend to identify the same group of adolescents, sharing many risk factors,  
20 including conduct problems.  
21  
22  
23  
24  
25  
26  
27  
28  
29  
30

31 Among Norwegian adolescence, physical activity seemed moderately protective  
32 against suicidal ideation, but the effect was most evident among boys and among  
33 students without alcohol experience in secondary school. Moderating effects of  
34 gender and alcohol use on health behaviour are also reported in some newer studies  
35  
36  
37  
38  
39

40 54-56  
41  
42  
43

#### 44 Strengths and limitations

45  
46 The Young-HUNT Study is a total population study with a high response rate and few  
47 drop-outs even at follow up. The study thus was representative for the population in  
48 Nord-Trøndelag, and Norway, at that time, but more important, it represents a  
49 baseline for general studies of later health effects in many years to come. The study  
50 was designed for prospective investigations, with approximately 4 years follow up  
51 time. Even if 4 years seems little in prospective studies, these years represents a  
52  
53  
54  
55  
56  
57  
58  
59  
60

1  
2  
3  
4 great leap in adolescent development. The questionnaire included a broad collection  
5  
6 of health and lifestyle background variables, some pre-validated, and some tested in  
7  
8 former research from Young-HUNT <sup>57</sup>. None of the variables used have diagnostic  
9  
10 precision, but represents broader problem groups in a majority of otherwise healthy  
11  
12 adolescents.  
13

14  
15  
16  
17  
18 However, some limitations have to be pointed out. The Regional Committee for  
19  
20 Medial and Research Ethics were concerned that even asking a question about  
21  
22 suicidal thoughts might initiate suicidal thinking and did not allow the question in  
23  
24 secondary school at the time. Exclusion of adolescence with suicidal thought at  
25  
26 baseline was thus not possible, so the study is based on lifetime suicidal thoughts  
27  
28 reported at follow up. Other studies have confirmed that suicidal thought are  
29  
30 developing between the age of 13 and 18 <sup>58</sup>, supporting our assumption of suicidal  
31  
32 thought mostly emerging during follow up time. Questions about self-harm was also  
33  
34 excluded.  
35  
36

37  
38 In third year of high school some students were attending vocational training, and  
39  
40 were not at school when the study was conducted. They were tried invited by post,  
41  
42 but response rate were low (34%). This represents a possible social bias, but former  
43  
44 studies have compared the baseline responses of the missing at follow up, without  
45  
46 finding any disturbing skewness <sup>32</sup>  
47

48  
49 The fully adjusted models require answers in all variables, and is no way to be totally  
50  
51 sure that the 1911 informants in the adjusted analysis are representative for the  
52  
53 whole cohort, but the similarity in results in crude ORs and adjusted ORs are  
54  
55 reassuring.  
56  
57  
58  
59  
60

1  
2  
3  
4  
5  
6  
7 According to existing literature and our factor analysis, it is not possible to separate  
8 anxiety from depression in SCL-5. The measure used in this study therefore  
9 represents the symptom load of mixed anxiety and depression. Evidence from adult  
10 population supports that mixed anxiety and depression, rather than single conditions,  
11 is strongly associated with suicide<sup>59,60</sup>.  
12  
13  
14  
15  
16  
17  
18  
19  
20  
21  
22  
23

#### 24 Conclusion and implications

25 Suicidal thoughts are frequent among high school students in Norway. In this study,  
26 anxiety/depression, conduct problems, overweight, together with pain and tension at  
27 the age of 13-15 years, were strongly associated with developing suicidal thoughts  
28 during late adolescence. The importance of externalizing behaviour seems under-  
29 communicated in the actual debate about risk factors and prevention of suicidal  
30 behaviours<sup>61</sup>.  
31  
32  
33  
34  
35  
36  
37  
38  
39

40 The role of early alcohol intoxication remained inconclusive, while physical activity  
41 might protect from suicidal thoughts among boys.  
42  
43

44 To study the pathway from suicidal thoughts to completed suicide, large scale  
45 population based studies with specified baseline measures on suicidal behaviours,  
46 should be linked with hospital- and mortality registries.  
47  
48  
49  
50  
51  
52  
53  
54  
55  
56  
57  
58  
59  
60

**Table 1. Baseline prevalence of health and behavioural problems, and lifestyle.** Total N=2 399, N completers suicidal thoughts=2 271, N physical examination =2 210

|                                         | Total |      | Boys |      | Girls |      |
|-----------------------------------------|-------|------|------|------|-------|------|
|                                         | N     | %    | N    | %    | N     | %    |
| <b>Mental health variables</b>          |       |      |      |      |       |      |
| Anxiety/depressive symptoms             | 397   | 16.5 | 128  | 11.5 | 269   | 21.0 |
| Attention problems                      | 448   | 18.7 | 188  | 16.9 | 260   | 20.2 |
| Conduct problems                        | 249   | 10.4 | 181  | 16.2 | 68    | 5.3  |
| Insomnia (DIS)                          | 185   | 7.7  | 67   | 6.0  | 118   | 9.2  |
| <b>Physical health variables</b>        |       |      |      |      |       |      |
| Pain and tension problems               | 453   | 18.9 | 148  | 13.3 | 305   | 23.8 |
| Underweight* (Total N=2210)             | 149   | 6.2  | 60   | 5.4  | 89    | 6.9  |
| Overweight* (Total N=2210)              | 303   | 12.6 | 138  | 12.4 | 165   | 12.9 |
| Obesity (Total N=2210)                  | 64    | 2.7  | 35   | 3.1  | 29    | 2.3  |
| <b>Lifestyle factors</b>                |       |      |      |      |       |      |
| Early alcohol intoxication(s)           | 624   | 26.0 | 267  | 23.9 | 357   | 27.8 |
| Physical activity (4 days/week or more) | 697   | 29.1 | 397  | 35.6 | 300   | 23.4 |
| Daily or occasional smoking             | 248   | 10.3 | 87   | 7.8  | 161   | 12.1 |

\* Over- and underweight are defined by international (IOTF) criteria based on BMI cut-off in each year- and gender-cohort

**Table 2. Logistic regression models; single input\* age adjusted associations and fully adjusted model\*\* of health and behavioural problems, and lifestyle at baseline 1995-97 with suicidal ideation at follow-up in 2000-01. N=2 271 (completers of suicidal thoughts question).**

|                               | Total |         |       |         | Boys |         |       |         | Girls |         |       |         |
|-------------------------------|-------|---------|-------|---------|------|---------|-------|---------|-------|---------|-------|---------|
|                               | OR*   | CI      | aOR** | CI      | OR*  | CI      | aOR** | CI      | OR*   | CI      | aOR** | CI      |
| <b>Mental health issues</b>   |       |         |       |         |      |         |       |         |       |         |       |         |
| Anxiety/depressive symptoms   | 2.7   | 2.1-3.4 | 1.9   | 1.4-2.6 | 3.5  | 2.3-5.4 | 2.8   | 1.7-4.8 | 2.3   | 1.7-3.1 | 1.5   | 1.0-2.2 |
| Attention problems            | 2.1   | 1.7-2.7 | 1.3   | 1.0-1.7 | 2.2  | 1.5-3.3 | 1.3   | 0.8-2.1 | 2.0   | 1.5-2.7 | 1.2   | 0.8-1.8 |
| Conduct problems              | 2.3   | 1.7-3.1 | 1.8   | 1.3-2.6 | 2.5  | 1.7-3.7 | 1.9   | 1.2-3.1 | 3.0   | 1.8-5.1 | 1.8   | 1.0-3.4 |
| Insomnia (DIS)                | 2.3   | 1.7-3.2 | 1.4   | 0.9-2.1 | 2.1  | 1.2-3.8 | 1.1   | 0.5-2.3 | 2.3   | 1.6-3.5 | 1.5   | 1.0-2.6 |
| <b>Physical health issues</b> |       |         |       |         |      |         |       |         |       |         |       |         |
| Pain and tension problems     | 2.7   | 2.1-3.4 | 1.8   | 1.4-2.4 | 3.1  | 2.1-4.8 | 2.0   | 1.2-3.3 | 2.3   | 1.7-3.2 | 1.7   | 1.2-2.5 |
| Underweight (Total N=2 210)   | 1.3   | 0.8-2.0 | 1.5   | 0.9-2.5 | 1.4  | 0.7-2.8 | 1.8   | 0.8-4.1 | 1.2   | 0.7-2.2 | 1.4   | 0.7-2.5 |
| Overweight (Total N=2 210)    | 1.7   | 1.3-2.3 | 1.9   | 1.4-2.7 | 1.6  | 1.0-2.6 | 2.0   | 1.1-3.4 | 1.7   | 1.2-2.6 | 1.8   | 1.2-2.8 |
| Obesity (Total N=2 210)       | 1.9   | 1.0-3.4 | 1.5   | 0.8-3.1 | 0.7  | 0.2-2.3 | 0.6   | 0.1-2.5 | 3.7   | 1.7-8.0 | 3.1   | 1.2-7.7 |
| <b>Lifestyle factors</b>      |       |         |       |         |      |         |       |         |       |         |       |         |
| Early alcohol intoxication(s) | 1.7   | 1.3-2.2 | 1.2   | 0.8-1.6 | 2.1  | 1.4-3.2 | 1.5   | 0.9-2.4 | 1.5   | 1.1-2.1 | 1.0   | 0.6-1.5 |
| Physical activity             | 0.7   | 0.5-0.9 | 0.7   | 0.5-0.9 | 0.7  | 0.5-0.9 | 0.6   | 0.4-0.9 | 0.8   | 0.6-1.1 | 0.7   | 0.5-1.1 |
| Daily or occasional smoking   | 2.1   | 1.5-2.8 | 1.5   | 1.0-2.3 | 2.1  | 1.2-3.5 | 1.0   | 0.5-2.0 | 2.0   | 1.3-2.9 | 1.9   | 1.2-3.1 |

1  
2  
3  
4  
5  
6  
7  
8 OR\* Odds ratio adjusted for age

9  
10 aOR\*\* Odds Ratio adjusted for age, anxiety/depressive symptoms, attention problems, conduct problems, insomnia, pain/tension problems, physical activity,  
11 alcohol intoxications and smoking.  
12  
13  
14  
15  
16  
17  
18  
19  
20  
21  
22  
23  
24  
25  
26  
27  
28  
29  
30  
31  
32  
33  
34  
35  
36  
37  
38  
39  
40  
41  
42  
43  
44  
45

1  
2  
3  
4  
5  
6  
7  
8  
9  
10  
11  
12  
13  
14  
15  
16  
17  
18  
19  
20  
21  
22  
23  
24  
25  
26  
27  
28  
29  
30  
31  
32  
33  
34  
35  
36  
37  
38  
39  
40  
41  
42  
43  
44  
45  
46  
47  
48  
49

**Table 3. Logistic regression; associations of frequencies of alcohol intoxications at baseline 1995-97 with suicidal ideation at follow-up in 2000-01.** OR from single input age adjusted models, and adjusted OR (aOR) from fully adjusted models

|                     | Total |         |       |         | Boys |         |       |         | Girls |         |       |         |
|---------------------|-------|---------|-------|---------|------|---------|-------|---------|-------|---------|-------|---------|
|                     | OR*   | 95%CI   | aOR** | 95%CI   | OR*  | 95%CI   | aOR** | 95%CI   | OR*   | 95%CI   | aOR** | 95%CI   |
| No early alc. intox | 1     |         | 1     |         | 1    |         | 1     |         | 1     |         | 1     |         |
| 1-3 alc. intox      | 1.5   | 1.1-2.0 | 1.1   | 0.8-1.6 | 1.7  | 1.1-2.8 | 1.3   | 0.8-2.3 | 1.3   | 0.9-1.9 | 0.9   | 0.6-1.5 |
| >4 alc. intox       | 1.9   | 1.3-2.7 | 1.3   | 0.8-2.1 | 2.5  | 1.4-4.4 | 1.8   | 0.9-2.6 | 1.5   | 1.0-2.5 | 1.1   | 0.6-2.0 |

OR\* Odds ratio adjusted for age

aOR\*\* Odds Ratio adjusted for age, anxiety/depressive symptoms, attention problems, conduct problems, insomnia, pain/tension problems, physical activity and smoking.

**Acknowledgments:**

The Nord-Trøndelag Health Study (The HUNT Study) is collaboration between HUNT Research Centre (Faculty of Medicine, Norwegian University of Science and Technology NTNU), Nord-Trøndelag County Council, Central Norway Health Authority, and the Norwegian Institute of Public Health.

**Funding**

This article was funded as a part of a PhD project by a grant from the Liaison Committee between the Central Norwegian Health Authority and the Norwegian University of Science and Technology. In addition North-Trøndelag County has contributed to the project. The funding providers played no role in study design, analysis, interpretation, writing or submission of this article.

**Contributorship statement**

**Arve Strandheim:** primary author, formed the idea and method, analysed and wrote the draft, coordinated and finished the manuscript.

**Ottar Bjerkset:** contributed in developing the idea, background and writing of the manuscript.

**David Gunnell:** developing the idea with the corresponding author, supervision in choice of methods and background literature in addition to forming the writing of the article.

**Sigrid Bjørnelv:** developed the methods of age- and sex stratified weight variable, wrote most of the eating part of the article and commented generally in the development of the article.

1  
2  
3  
4  
5  
6  
7 **Turid Lingaas Holmen** PI of the Young HUNT study, method supervisor, but also generally taking part in forming the text.

8  
9 **Niels Bentzen** Supervisor of the whole project. He was involved in development of ideas, writing and the general progress in the  
10  
11 work with the article.

### 12 **Competing Interest**

13  
14  
15 None of the authors declare any competing interests

### 16 **Data sharing**

17  
18  
19  
20 Technical appendix, statistical details and dataset are accessible from the corresponding author. Extra data can be made available  
21  
22 by e-mailing Young-HUNT PI, Professor Turid Lingaas Holmen, turid.lingaas.holmen@ntnu.no  
23  
24  
25  
26  
27  
28  
29  
30  
31  
32  
33  
34  
35  
36  
37  
38  
39  
40  
41  
42  
43  
44  
45  
46  
47  
48  
49

## Reference List

- 1  
2  
3  
4  
5  
6  
7  
8  
9 (1) Fergusson DM, Lynskey MT. Suicide attempts and suicidal ideation in a birth cohort  
10 of 16-year-old New Zealanders. *J Am Acad Child Adolesc Psychiatry* 1995;  
11 34(10):1308-1317.
- 12  
13 (2) Nock MK, Borges G, Bromet EJ, Alonso J, Angermeyer M, Beautrais A et al. Cross-  
14 national prevalence and risk factors for suicidal ideation, plans and attempts. *Br J*  
15 *Psychiatry* 2008; 192(2):98-105.
- 16  
17 (3) Ten HM, de GR, van DS, et al. Incidence and course of suicidal ideation and suicide  
18 attempts in the general population. *Can J Psychiatry* 2009; 54(12):824-833.
- 19  
20 (4) Boden JM, Fergusson DM, Horwood LJ. Anxiety disorders and suicidal behaviours in  
21 adolescence and young adulthood: findings from a longitudinal study. *Psychol Med*  
22 2007; 37(3):431-440.
- 23  
24 (5) Bradvik L, Mattisson C, Bogren M, et al. Long-term suicide risk of depression in the  
25 Lundby cohort 1947-1997--severity and gender. *Acta Psychiatr Scand* 2008;  
26 117(3):185-191.
- 27  
28 (6) Brent DA. Risk factors for adolescent suicide and suicidal behavior: mental and  
29 substance abuse disorders, family environmental factors, and life stress. *Suicide Life*  
30 *Threat Behav* 1995; 25 Suppl:52-63.
- 31  
32 (7) Enns MW, Cox BJ, Afifi TO, et al. Childhood adversities and risk for suicidal ideation  
33 and attempts: a longitudinal population-based study. *Psychol Med* 2006; 36(12):1769-  
34 1778.
- 35  
36 (8) Sund AM, Larsson B, Wichstrom L. Psychosocial correlates of depressive symptoms  
37 among 12-14-year-old Norwegian adolescents. *J Child Psychol Psychiatry* 2003;  
38 44(4):588-597.
- 39  
40 (9) Wichstrom L. Predictors of adolescent suicide attempts: a nationally representative  
41 longitudinal study of Norwegian adolescents. *J Am Acad Child Adolesc Psychiatry*  
42 2000; 39(5):603-610.
- 43  
44 (10) Chronis-Tuscano A, Molina BS, Pelham WE, et al. Very early predictors of  
45 adolescent depression and suicide attempts in children with attention-  
46 deficit/hyperactivity disorder. *Arch Gen Psychiatry* 2010; 67(10):1044-1051.
- 47  
48 (11) Evans E, Hawton K, Rodham K. Factors associated with suicidal phenomena in  
49 adolescents: a systematic review of population-based studies. *Clin Psychol Rev* 2004;  
50 24(8):957-979.
- 51  
52 (12) Boden JM, Fergusson DM, Horwood LJ. Anxiety disorders and suicidal behaviours in  
53 adolescence and young adulthood: findings from a longitudinal study. *Psychol Med*  
54 2007; 37(3):431-440.
- 55  
56  
57  
58  
59  
60

- 1  
2  
3  
4 (13) Gunnell D, Harbord R, Singleton N, et al. Factors influencing the development and  
5 amelioration of suicidal thoughts in the general population. Cohort study. *Br J*  
6 *Psychiatry* 2004; 185:385-393.
- 7  
8  
9 (14) Bjerkeset O, Romundstad P, Evans J, et al. Association of adult body mass index and  
10 height with anxiety, depression, and suicide in the general population: the HUNT  
11 study. *Am J Epidemiol* 2008; 167(2):193-202.
- 12  
13 (15) Carpenter KM, Hasin DS, Allison DB, et al. Relationships between obesity and DSM-  
14 IV major depressive disorder, suicide ideation, and suicide attempts: results from a  
15 general population study. *Am J Public Health* 2000; 90(2):251-257.
- 16  
17 (16) Crow S, Eisenberg ME, Story M, et al. Are body dissatisfaction, eating disturbance,  
18 and body mass index predictors of suicidal behavior in adolescents? A longitudinal  
19 study. *J Consult Clin Psychol* 2008; 76(5):887-892.
- 20  
21 (17) Wilcox HC, Conner KR, Caine ED. Association of alcohol and drug use disorders and  
22 completed suicide: an empirical review of cohort studies. *Drug Alcohol Depend* 2004;  
23 76 Suppl:S11-S19.
- 24  
25 (18) Borges G, Walters EE, Kessler RC. Associations of substance use, abuse, and  
26 dependence with subsequent suicidal behavior. *Am J Epidemiol* 2000; 151(8):781-789.
- 27  
28 (19) Chatterji P, Dave D, Kaestner R, et al. Alcohol abuse and suicide attempts among  
29 youth. *Econ Hum Biol* 2004; 2(2):159-180.
- 30  
31 (20) Roane BM, Taylor DJ. Adolescent insomnia as a risk factor for early adult depression  
32 and substance abuse. *Sleep* 2008; 31(10):1351-1356.
- 33  
34 (21) Braden JB, Sullivan MD. Suicidal thoughts and behavior among adults with self-  
35 reported pain conditions in the national comorbidity survey replication. *J Pain* 2008;  
36 9(12):1106-1115.
- 37  
38 (22) Woolley SB, Fredman L, Goethe JW, et al. Headache complaints and the risk of  
39 suicidal thoughts or behaviors. *J Nerv Ment Dis* 2008; 196(11):822-828.
- 40  
41 (23) Bronisch T, Hofler M, Lieb R. Smoking predicts suicidality: findings from a  
42 prospective community study. *J Affect Disord* 2008; 108(1-2):135-145.
- 43  
44 (24) Sagatun A, Sogaard AJ, Bjertness E, et al. The association between weekly hours of  
45 physical activity and mental health: a three-year follow-up study of 15-16-year-old  
46 students in the city of Oslo, Norway. *BMC Public Health* 2007; 7:155.
- 47  
48 (25) Sund AM, Larsson B, Wichstrom L. Role of physical and sedentary activities in the  
49 development of depressive symptoms in early adolescence. *Soc Psychiatry Psychiatr*  
50 *Epidemiol* 2011; 46(5):431-441.
- 51  
52 (26) Groholt B, Ekeberg O, Wichstrom L, et al. Sex differences in adolescent suicides in  
53 Norway, 1990-1992. *Suicide Life Threat Behav* 1999; 29(4):295-308.
- 54  
55  
56  
57  
58  
59  
60

- 1  
2  
3  
4  
5  
6  
7  
8  
9  
10  
11  
12  
13  
14  
15  
16  
17  
18  
19  
20  
21  
22  
23  
24  
25  
26  
27  
28  
29  
30  
31  
32  
33  
34  
35  
36  
37  
38  
39  
40  
41  
42  
43  
44  
45  
46  
47  
48  
49  
50  
51  
52  
53  
54  
55  
56  
57  
58  
59  
60
- (27) Lewinsohn PM, Rohde P, Seeley JR, Baldwin CL. Gender differences in suicide attempts from adolescence to young adulthood. *J Am Acad Child Adolesc Psychiatry* 2001; 40(4):427-434.
- (28) Cantor C, Neulinger K. The epidemiology of suicide and attempted suicide among young Australians. *Aust N Z J Psychiatry* 2000; 34(3):370-387.
- (29) Heuveline P, Slap GB. Adolescent and young adult mortality by cause: age, gender, and country, 1955 to 1994. *J Adolesc Health* 2002; 30(1):29-34.
- (30) Boeninger DK, Masyn KE, Feldman BJ, et al. Sex differences in developmental trends of suicide ideation, plans, and attempts among European American adolescents. *Suicide Life Threat Behav* 2010; 40(5):451-464.
- (31) Mather AA, Cox BJ, Enns MW, et al. Associations of obesity with psychiatric disorders and suicidal behaviors in a nationally representative sample. *J Psychosom Res* 2009; 66(4):277-285.
- (32) Holmen TL, Bratberg G, Krokstad S, et al. Cohort profile of the Young-HUNT Study, Norway: a population-based study of adolescents. *Int J Epidemiol* 2014; 43(2):536-544.
- (33) Strandheim A, Holmen TL, Coombes L, et al. Alcohol intoxication and mental health among adolescents - a population review of 8983 young people, 13-19 years in North-Trøndelag, Norway: the Young-HUNT Study. *Child Adolesc Psychiatry Ment Health* 2009; 3(1):18.
- (34) Strandheim A, Holmen TL, Coombes L, et al. Alcohol use and physical health in adolescence: a general population survey of 8,983 young people in North-Trøndelag, Norway (the Young-HUNT study). *Subst Use Misuse* 2010; 45(1-2):253-265.
- (35) Pedersen G, Karterud S. Is SCL-90R helpful for the clinician in assessing DSM-IV symptom disorders? *Acta Psychiatr Scand* 2004; 110(3):215-224.
- (36) Tambs K, Moum T. How well can a few questionnaire items indicate anxiety and depression? *Acta Psychiatr Scand* 1993; 87(5):364-367.
- (37) Strand BH, Dalgard OS, Tambs K, et al. Measuring the mental health status of the Norwegian population: a comparison of the instruments SCL-25, SCL-10, SCL-5 and MHI-5 (SF-36). *Nord J Psychiatry* 2003; 57(2):113-118.
- (38) Storksen I, Roysamb E, Moum T, et al. Adolescents with a childhood experience of parental divorce: a longitudinal study of mental health and adjustment. *J Adolesc* 2005; 28(6):725-739.
- (39) Storksen I, Roysamb E, Holmen TL, et al. Adolescent adjustment and well-being: effects of parental divorce and distress. *Scand J Psychol* 2006; 47(1):75-84.
- (40) Neckelmann D, Mykletun A, Dahl AA. Chronic insomnia as a risk factor for developing anxiety and depression. *Sleep* 2007; 30(7):873-880.

- 1  
2  
3  
4  
5  
6  
7  
8  
9  
10  
11  
12  
13  
14  
15  
16  
17  
18  
19  
20  
21  
22  
23  
24  
25  
26  
27  
28  
29  
30  
31  
32  
33  
34  
35  
36  
37  
38  
39  
40  
41  
42  
43  
44  
45  
46  
47  
48  
49  
50  
51  
52  
53  
54  
55  
56  
57  
58  
59  
60
- (41) Booth ML, Okely AD, Chey T, et al. The reliability and validity of the physical activity questions in the WHO health behaviour in schoolchildren (HBSC) survey: a population study. *Br J Sports Med* 2001; 35(4):263-267.
- (42) Bjornelv S, Lydersen S, Mykletun A, et al. Changes in BMI-distribution from 1966-69 to 1995-97 in adolescents. The Young-HUNT study, Norway. *BMC Public Health* 2007; 7:279.
- (43) Cole TJ, Flegal KM, Nicholls D, et al. Body mass index cut offs to define thinness in children and adolescents: international survey. *BMJ* 2007; 335(7612):194.
- (44) Strandheim A, Holmen TL, Coombes L, et al. Alcohol intoxication and mental health among adolescents - a population review of 8983 young people, 13-19 years in North-Trøndelag, Norway: the Young-HUNT Study. *Child Adolesc Psychiatry Ment Health* 2009; 3(1):18.
- (45) Strandheim A, Bratberg GH, Holmen TL, et al. The influence of behavioural and health problems on alcohol and drug use in late adolescence - a follow up study of 2 399 young Norwegians. *Child Adolesc Psychiatry Ment Health* 2011; 5(1):17.
- (46) Engqvist U, Rydelius PA. Death and suicide among former child and adolescent psychiatric patients. *BMC Psychiatry* 2006; 6:51.
- (47) Harris EC, Barraclough B. Suicide as an outcome for mental disorders. A meta-analysis. *Br J Psychiatry* 1997; 170:205-228.
- (48) Glass K, Flory K, Martin A, et al. ADHD and comorbid conduct problems among adolescents: associations with self-esteem and substance use. *Atten Defic Hyperact Disord* 2011; 3(1):29-39.
- (49) Kirkcaldy BD, Siefen GR, Urkin J, et al. Risk factors for suicidal behavior in adolescents. *Minerva Pediatr* 2006; 58(5):443-450.
- (50) Huh Y, Choi I, Song M, et al. A comparison of comorbidity and psychological outcomes in children and adolescents with attention-deficit/hyperactivity disorder. *Psychiatry Investig* 2011; 8(2):95-101.
- (51) Rutter M. Research review: Child psychiatric diagnosis and classification: concepts, findings, challenges and potential. *J Child Psychol Psychiatry* 2011; 52(6):647-660.
- (52) Brunner J, Bronisch T, Pfister H, et al. High cholesterol, triglycerides, and body-mass index in suicide attempters. *Arch Suicide Res* 2006; 10(1):1-9.
- (53) Galaif ER, Sussman S, Newcomb MD, et al. Suicidality, depression, and alcohol use among adolescents: a review of empirical findings. *Int J Adolesc Med Health* 2007; 19(1):27-35.
- (54) Barry AE, Piazza-Gardner AK. Drunkorexia: understanding the co-occurrence of alcohol consumption and eating/exercise weight management behaviors. *J Am Coll Health* 2012; 60(3):236-243.

- 1  
2  
3  
4  
5  
6  
7  
8  
9  
10  
11  
12  
13  
14  
15  
16  
17  
18  
19  
20  
21  
22  
23  
24  
25  
26  
27  
28  
29  
30  
31  
32  
33  
34  
35  
36  
37  
38  
39  
40  
41  
42  
43  
44  
45  
46  
47  
48  
49  
50  
51  
52  
53  
54  
55  
56  
57  
58  
59  
60
- (55) Buscemi J, Martens MP, Murphy JG, et al. Moderators of the relationship between physical activity and alcohol consumption in college students. *J Am Coll Health* 2011; 59(6):503-509.
- (56) Kwan MY, Cairney J, Faulkner GE, et al. Physical activity and other health-risk behaviors during the transition into early adulthood: a longitudinal cohort study. *Am J Prev Med* 2012; 42(1):14-20.
- (57) Bratberg GH, Nilsen TI, Holmen TL, et al. Sexual maturation in early adolescence and alcohol drinking and cigarette smoking in late adolescence: a prospective study of 2,129 Norwegian girls and boys. *Eur J Pediatr* 2005; 164(10):621-625.
- (58) Glowinski AL, Bucholz KK, Nelson EC, et al. Suicide attempts in an adolescent female twin sample. *J Am Acad Child Adolesc Psychiatry* 2001; 40(11):1300-1307.
- (59) Mykletun A, Bjerkeset O, Dewey M, et al. Anxiety, depression, and cause-specific mortality: the HUNT study. *Psychosom Med* 2007; 69(4):323-331.
- (60) Bjerkeset O, Mykletun A, Dahl AA, et al. Mortality in relation to self-reported mixed anxiety and depression symptoms--The HUNT study. *Nord J Psychiatry* 2007; 61(1):6-11.
- (61) Nordentoft M. Prevention of suicide and attempted suicide in Denmark. Epidemiological studies of suicide and intervention studies in selected risk groups. *Dan Med Bull* 2007; 54(4):306-369.

# Risk factors for suicidal thoughts in adolescence – a prospective cohort study - The Young-HUNT study.

\*Arve Strandheim<sup>1,2,3</sup>, Ottar Bjerkeset<sup>4,5</sup>, David Gunnell<sup>6</sup>, Sigrid Bjørnelv<sup>4,7</sup>, Turid  
Lingaas Holmen<sup>2,3</sup>, Niels Bentzen<sup>2</sup>

\*corresponding author: arve.strandheim@ntnu.no

1) Department of Child and Adolescent Psychiatry, Levanger Hospital, Nord-Trøndelag Health Trust,  
Norway

2) Department of Public Health and General Practice, the Faculty of Medicine (ISM), Norwegian  
University of Science and Technology (NTNU)

3) HUNT research centre, Department of Public Health and General Practice, Faculty of Medicine,  
NTNU

~~4) Department of Neuroscience, Faculty of Medicine, Norwegian University of Science and  
Technology, Trondheim, Norway~~

~~5) Department of Research and Development (RaD), Levanger Hospital, Nord-Trøndelag Health  
Trust, Norway~~

~~4) Faculty of Health Sciences, Nord-Trøndelag University College (HiNT), Levanger, Norway~~

~~5) Department of Neuroscience, Faculty of Medicine, Norwegian University of Science and  
Technology, Trondheim, Norway~~

6) School of Social and Community Medicine, University of Bristol, UK

7) Department of Psychiatry, Levanger Hospital, Nord-Trøndelag Health Trust, Norway

Word count: 5989

None of the authors declare any conflict of interest

## ABSTRACT

**Background:** Suicidal thoughts and suicidal behaviour emerge and increase during adolescence. A wide range of mental and physical health indicators, behaviours and lifestyle characteristics ~~are reported to~~ influence the development of suicidal thoughts in adolescence, yet the epidemiological evidence is inconclusive.

**Objectives:** ~~To examine~~ Examine the associations between health- and lifestyle factors recorded in the participants' early teens, and development of suicidal thoughts recorded 4 years later.

**Participants:** Population based cohort study of 2 399 secondary school students who ~~attended~~ participated in the Young-Hunt 1 study in 1995-1997 (13-15 years old) were included in a follow-up study 4 years later (17-19 years old).

**Settings:** All students s in the two relevant year -classes in Nord-Trøndelag County were invited, 80% attended both waves of data collection.

**Outcome measure:** Suicidal thoughts reported ~~in late adolescence~~ at age 17-19 years.

**Results:** 408 (17%, 95% Confidence Interval (CI) 15.5-18.5) of the adolescents reported suicidal thoughts at follow up, 158 (14.2%, CI 13.6-16.4) boys and 250 (19.5%, CI 18.8-22.0) girls. Baseline anxiety and depressive symptoms (adjusted Odds Ratio (aOR) 1.9, CI 1.4-2.6), conduct problems (aOR 1.8, CI 1.3-2.6), overweight (aOR 1.9 CI 1.4-2.4), and muscular pain and tension (aOR 1.8, CI 1.4-2.4), were all associated with reporting suicidal thoughts at follow up.

**Conclusion:** One in six adolescents in high school/young adults experienced suicidal thoughts, girls predominating. Suicidal thoughts in late teens were most strongly associated with symptoms of anxiety/depression, conduct problems, pain/tension problems and overweight reported when participants were 13-15 years old. Specific preventive efforts in these groups might be indicated. Future research should investigate whether similar associations are seen with suicide/suicidal attempts as endpoints would give us further important information both for health service and prevention.

#### **Strengths and limitations of this study.**

- Whole county cohort study with follow up after 4 years
- Exposure variables: behaviour/health traits, outcome: suicidal thoughts
- Suicidal thought were prevalent in late adolescence, boys 14.2%, girls 19.5%
- Suicidal thought were associated with anxiety/depression, conduct problem, pain/tension and overweight in early adolescence

#### INTRODUCTION

Suicidal thoughts and suicidal behaviours develop during adolescence and peak late in adolescence and early adulthood <sup>1</sup>. Recent findings from research in total populations based studies, indicates that suicidal thoughts and attempts are parts of a continuum and share a common risk profile <sup>2,3</sup>. It is well known from general population studies that anxiety and depression contribute to raised suicide risk <sup>4,4-6,6</sup>, yet some prospective studies have also linked anxiety and depression to increased

1  
2  
3  
4  
5  
6  
7  
8 incidence of suicidal thoughts [3:7-9;7](#). In ~~addition~~[adolescence](#), externalizing disorders  
9 like ADHD and Conduct Disorders have been associated with suicidal attempts, and  
10 to a lesser extent suicidal thoughts [10:11;8-9](#). Further, ~~there is~~ empirical support ~~that has~~  
11 ~~been gained for the influence of~~ childhood adversities, ~~such~~ as low social support,  
12 sexual abuse, domestic violence and maternal depression, ~~influence on~~ the  
13 development of suicidal thoughts during adolescence [4:7;12;13;7;10;14](#). The findings from  
14 studies on weight problems, both under- and overweight, and suicidal thoughts are  
15 contradictory, but overweight is often reported as a risk factor among adults [14-16;12-14](#).  
16 Even though adult alcohol problems contributes to a ten-fold increase in suicide  
17 related mortality [17;15](#), the relationship between alcohol use and suicidal thoughts in  
18 adolescence is sparsely studied the last decade [18;19;16;17](#). Further, sleep disturbance  
19 [20;18](#), pain, especially headache [21;22;19;20](#), smoking and reduced physical activity <sup>23-</sup>  
20 [25;21;22](#) all have been reported to have a positive association with suicidal ideation ~~in~~  
21 ~~the adolescent general population~~.

22  
23  
24  
25  
26  
27  
28  
29  
30  
31  
32  
33  
34  
35 Complex and partly paradoxical finding on gender differences complicate the  
36 understanding of adolescence suicidal ideation and behaviour. While girls report  
37 suicidal thoughts more often than boys during adolescence [26;27;23;24](#), completed  
38 suicide in adolescence and young adulthood is 3 to 4 times more common in males  
39 than females in the Western World [26;28;29;23;25;26](#). The ~~prevalence of suicidal thoughts~~  
40 ~~frequency of among~~ girls ~~with suicidal thoughts~~ peaks about 16 years of age, while it  
41 continues to increase beyond the age of 19 in boys [30;27](#). Intriguingly, in adults  
42 overweight may be protective of suicide among males and a risk factor among  
43 females in the general population [15;31;14;28](#).

44  
45  
46  
47  
48  
49  
50  
51  
52 However, few large scale prospective studies have examined a wide range of risk-  
53 and protective factors for suicidal thoughts among adolescent boys and girls.  
54  
55  
56  
57  
58  
59  
60

1  
2  
3  
4  
5  
6  
7  
8 The aim of this exploratory population study was to ~~prospectively~~ investigate the  
9 association of different risk factors in early adolescence with the development of  
10 suicidal thoughts ~~until late adolescence~~ 4 years later. Based on ~~existing the previous~~  
11 literature we hypothesized that girls, individuals with high levels of anxiety and  
12 depression, inattentiveness, conduct problems, and alcohol-intoxications at baseline  
13 would be at increased risk of suicidal thoughts at follow-up.  
14  
15  
16  
17  
18  
19  
20  
21  
22  
23  
24  
25  
26  
27  
28  
29  
30  
31  
32  
33  
34  
35  
36  
37  
38  
39  
40  
41  
42  
43  
44  
45  
46  
47  
48  
49  
50  
51  
52  
53  
54  
55  
56  
57  
58  
59  
60

## METHOD

### *Study design, setting and participants*

Young-HUNT 1, the first ~~adolescent~~ wave of the [adolescent part of the HUNT study](#) (Nord-Trøndelag Health Study) (<http://www.ntnu.no/hunt/english>)<sup>2932</sup>, took place between 1995 and 1997. All teenagers (13-19 years) attending secondary and high schools in the county were invited to participate, and 90% attended. In Young-HUNT 2, (2000-2001) students in the last two years of high school or vocational training (age 17- 19) were invited; of these 2 399 (80%) attended both Young-HUNT 1 and 2. The mean follow-up time was 3.9 years.

Both at baseline and follow-up, the participants completed a self-report questionnaire in class and underwent a physical examination; including height and weight.

All 2 399 students who took part in both Young-HUNT 1 and 2 were included in the present study, but analyses of associations with weight are based on the 2 271 participants who took part in the clinical examination.

### Ethics

All the potential participants and their parents received a written statement about the study one month prior to the collection of the data, making a discussion possible before signing the consent. Voluntary participation was stressed both to the adolescents and their parents.

### Measures

1  
2  
3  
4  
5  
6  
7  
8 The Young-HUNT questionnaire includes a broad spectrum of health related  
9 variables relevant for this study (<http://www.ntnu.edu/hunt/data/que>). Some  
10 categorical variables were already dichotomized, other variables ([as anxiety and](#)  
11 [depressive symptoms, attention- and conduct problems, pain and tension symptoms](#))  
12 were based on instruments with multiple sub-questions and alternative answers.  
13  
14 ~~Variables- categorisation of responses to these questions transformation werewas~~  
15 based on factor analysis, described in ~~earlierformer~~ studies [33:3430:34](#).

21  
22  
23 Outcome measure at follow-up

24 Suicidal thoughts

25  
26  
27 At follow up the students were asked: "Have you had thoughts about taking your own  
28 life?" ([yes/no](#)). Positive responses were labelled as suicidal thoughts.

29  
30  
31  
32 Exposure variables at baseline

33  
34  
35  
36 Anxiety and depressive symptoms

37  
38 ~~Derived f~~From the Symptom Check List 90 R [3532](#), an abbreviated and previously  
39 validated five item scale, SCL-5 [36:3733:34](#), was integrated in the questionnaire.

40  
41  
42 According to ~~former-previous~~ studies [3835](#) and to our factor analysis, we included all  
43 five items in our variable.  
44  
45

46  
47  
48 Attention- and conduct problems

49  
50 A 14-item school-adjustment questionnaire was included in Young-HUNT, described  
51 in previous studies [33:3930:36](#), was utilised to define attention- and conduct variables. A  
52 factor analysis identified two separate factors; attention problems and conduct  
53  
54  
55  
56  
57  
58  
59  
60

1  
2  
3  
4  
5  
6  
7  
8 problems. [Conduct problems include disagreement with teacher, such -as quarrels](#)  
9 [and scolding, as well as involvement in fights at school; attention problems include](#)  
10 [both inattention and hyperkinetic symptoms.](#) The summarized scores of all items in  
11  
12 each category were dichotomised into low or high scores; defining scores above the  
13  
14 70 percentile for the study population as high.  
15  
16

#### 17 18 19 Pain and tension symptoms

20  
21 The following 4 items constituted the pain/tension variable: headache, neck pain,  
22  
23 muscle and joint pain and palpitations the last 12 months. The values were  
24  
25 dichotomized according to the 70<sup>th</sup> percentile, defining students with score above as  
26  
27 high <sup>3431</sup>.  
28  
29

#### 30 31 Alcohol use

32  
33 Baseline alcohol status was defined using number of reported alcohol intoxications.  
34  
35 The students answered the question: "Have you ever been drunk". The variable were  
36  
37 dichotomized to "never" or "ever", [and named-called](#) "early alcohol intoxication". [For](#)  
38 [further differentiation early alcohol intoxications were divided in three: none, 1-3, 4](#)  
39 [and more \(table 3\).](#)  
40  
41  
42

#### 43 44 Smoking

45  
46 ~~Baseline~~ Smoking [at baseline](#) was assessed using the question: "Do you smoke?"  
47  
48 [\(yes/no\)](#). Current smoking was defined as "yes" to smoking daily or occasionally.  
49  
50

#### 51 52 Sleep disturbance

53  
54  
55  
56  
57  
58  
59  
60

1  
2  
3  
4  
5  
6  
7  
8 Baseline sleep disturbance was defined as difficulties initiating sleep (DIS); “In the  
9 last month, have you had difficulty falling asleep?”. “Almost every night” and “often”  
10 were classified as insomnia in accordance with former research [4037](#).  
11  
12

#### 13 14 15 Physical activity

16  
17 Level of physical activity at baseline was estimated using the question: “With  
18 exception of school activity, how many days a week do you practice sports or  
19 exercise to the point where you breathe heavily and/or sweat?”. “Four days a week or  
20 more” was classified as being regular physically active [4138](#).  
21  
22  
23

#### 24 25 26 Height and weight

27  
28 Height and weight were measured by especially trained nurses to the nearest  
29 centimetre, respectively nearest half kilogram with light clothes, without shoes, jacket  
30 or outdoor garments. Body mass index [4239](#) was calculated as body weight (kg)  
31 divided by the square value of height (m). Using the age- and gender-specific BMI-  
32 cut-offs for children and adolescents recommended by the International Obesity Task  
33 Force underweight was defined corresponding to BMI 18.5 kg per metre squared [or](#)  
34 [less](#) in adults [4340](#). Overweight was defined using age- and gender-specific BMI-cut-  
35 offs corresponding to BMI interval between 25 and 30 in adults and obese were  
36 defined with cut offs corresponding to BMI 30 and beyond in adults.  
37  
38  
39  
40  
41  
42  
43  
44  
45  
46  
47  
48  
49

#### 50 Statistics

51  
52 PASW Statistics 18 was used for data analysis. Frequencies are given as  
53 percentages and 95% Confidence Intervals for proportions were included for  
54  
55  
56  
57  
58  
59  
60

1  
2  
3  
4  
5  
6  
7  
8 comparison. Logistic regression was the main statistical analysis in the study,  
9 presenting result as odds ratios (OR) with 95% Confidence interval (CI).

10  
11 In the main analysis, [univariable logistic regression analyses were](#) first used to  
12 examine the crude associations between the health and behavioural exposures with  
13 suicidal ideation at follow up. Results were stratified on gender, adjustment only  
14 made for age ~~(Table 2)~~. Then all the variables were entered in the same models  
15 stratified by gender (Table 2), thus adjusting for each other in addition to age. The  
16 fully adjusted models in this study include only participants that both completed all  
17 the variables used from the questionnaire and had participated in the clinical  
18 examination, giving a total number of completers of 1 911 in these models.  
19  
20  
21  
22  
23  
24  
25  
26  
27  
28

29 According to results from former studies ~~using with~~ the Young –HUNT dataset  
30 [34:4531:41:42](#), several clinically relevant statistical interactions were tested for. [In the](#)  
31 [present study](#) interactions were shown between gender and overweight (p=0.01),  
32 possible interactions also between gender and anxiety/depressive symptoms  
33 (p=0.09), pain and tension (p=0.10) and early alcohol ~~debut~~ [\(intoxication](#) (p=0.09)  
34 [\(Table 2\)](#). Accordingly, all analyses were stratified by gender [\(Table 2\)](#). Further,  
35 there were possible interactions shown between early alcohol intoxication and  
36 anxiety/depressive symptoms (p= 0.07) or physical activity (p=0.05) analysing for  
37 suicidal thoughts. To control for these potential interactions, analysis stratified on the  
38 presence of early alcohol intoxication were conducted, but only gave modest effect  
39 on the ORs and are not shown here.  
40  
41  
42  
43  
44  
45  
46  
47  
48  
49  
50  
51  
52  
53  
54  
55  
56  
57  
58  
59  
60

## RESULTS

Altogether 2 399 students (80 % of the eligible) completed the questionnaire in both waves of the study, 1 115 boys (46.5%) and 1 284 girls. 2 271 students answered the question on suicidal thoughts at follow-up; 408 students (17%) reported having had suicidal thoughts, and the prevalence was 14.2% (CI 13.6-16.4) in boys and 19.5% (CI 18.8-22.0) in girls.

At baseline symptoms of anxiety and depression were more frequent among girls (21.0%, CI 18.8-23.2), than boys (11.5%, CI 9.6-13.4) (Table 1), as was daily or occasional smoking: girls (12.1%, CI 10.3-13.9), boys (7.8%, CI 6.2-9.4). Conduct problems were more frequent among boys (16.2 %, CI 14.4-18.4), than girls (5.3%, CI 4.1-6.5) and more boys were physically active (35.6%, CI 32.8-38.4), compared to girls (23.4%, CI 21.1-25.7).

Table 1 inserted here

In the univariable age adjusted models (Table 2), anxiety and depressive symptoms, attention- and conduct problems, insomnia, pain/tension problems and smoking at baseline more than doubled the odds for suicidal thoughts at follow-up in both genders. Alcohol intoxication and overweight at baseline had moderate effects on suicidal thoughts (50-70% increase) in both genders (Table 2), whereas underweight did not show an influence on suicidal ideation in this study. Physical activity 4-7 days a week had a protective effect (OR: 0.7, CI 0.5-0.9), whereas smoking at baseline increased odds for suicidal thoughts 4 years later (OR 2.1, CI 1.5-2.8).

Table 2 inserted here

1  
2  
3  
4  
5  
6  
7  
8  
9  
10 In the fully adjusted model stratified by gender, anxiety and depressive symptoms  
11 (aOR 1.9, CI 1.4-2.6), together with pain and tension problems (aOR 1.8, CI 1.4-2.4)  
12 still seemed strongly associated with later suicidal ideation, especially among boys.  
13 Conduct problems also remained robustly associated to suicidal thoughts (aOR 1.8,  
14 CI 1.3-2.6) after adjustment. The association with overweight was strengthened (aOR  
15 1.9, CI 1.4-2.7), with a robust relationship demonstrated also even among boys (aOR  
16 2.0, CI 1.1-3.4). In contrast; obesity was strongly associated with suicidal thoughts  
17 only among girls (aOR 3.1, CI 1.2-7.7). Further, smoking was associated with suicidal  
18 thoughts, specifically among girls (aOR 1.9, CI 1.2-3.1).

19 The effect of early alcohol intoxications on crude OR for suicidal thoughts ~~tends to~~  
20 ~~weakened by correction in models controlling for other important variables;~~  
21 ~~especially controlling for smoking in particular attenuated the strength of the~~  
22 ~~associations smoking. Such effects were also seen when the association with alcohol~~  
23 ~~was investigated across 3 levels of increasing exposure. Even used as a continuous~~  
24 ~~variable, or split in three, adjustments remove the association observed in the~~  
25 ~~bivariate models~~ (Table 3). Attention problems, insomnia and early alcohol  
26 intoxications did not show statistically significant associations with suicidal thought in  
27 the fully integrated model.

28  
29  
30  
31  
32  
33  
34  
35  
36  
37  
38  
39  
40  
41  
42  
43  
44  
45 Table 3 inserted here

46 The protective effect of physical activity was evident among boys (aOR 0.6 CI 0.4-  
47 0.9) but not significantly among girls (aOR 0.7 CI 0.5-1.1). Further stratified analyses  
48 showed that the protective association was evident in the group not reporting early  
49 alcohol intoxication(s) (OR 0.6, CI 0.4-0.8), compared to the group with early  
50 intoxication (OR 1.0, CI 0.6-1.6).

## DISCUSSION

Anxiety and depressive symptoms, together with pain and muscular tension, were associated with [nearly a 2-3 fold-doubled](#) increased risk for development of suicidal thoughts during adolescence; and more so in boys than girls. Attention problems also had a similar [unadjusted](#) effect, which we suspect might be mediated through other health problems, like depression, visualized by reduced OR after adjustment in our analysis.

In accordance with previous suicide-research [46:4743-44](#), we found that conduct problems robustly increased the odds for suicidal thoughts in both genders. Conduct problems [as well as conduct disorder](#) emerge early in child development, and include some degree of impulsivity, frustration, poor academic achievement, social marginalization and often low self-esteem [4845](#), all previously linked to suicidal behaviours and suicide [4946](#). [Using diagnostic categories, co-morbidity in conduct problems-disorder](#) is common, especially with attention [and hyperactivity disorders problems](#) [50:5147:48](#). ~~Both the~~ [F-features that are](#) specific for (e.g. social reaction on rule breaking behaviour), and [features that commonly occur](#) within attention- and conduct problems (as impulsivity), can be basis for development of suicidality. The link might also be mediated through development of depressive symptoms around puberty.

However, [our broad category of](#) conduct problems seems robustly associated with

1  
2  
3  
4  
5  
6  
7  
8 suicidal thoughts even after ~~correcting~~[controlling](#) for depression and other possible  
9 confounders.

10  
11 The [observation that](#) boys seemed more vulnerable to anxiety and depressive  
12 symptoms, is in accordance with a previous study on adolescents with major  
13 depressive disorder [2724](#). The gender differences in findings may be related to the fact  
14 that depressive states are less frequent among boys, or might be reported by boys  
15 with more serious problems, thus representing a more extreme sample. The  
16 dissimilarity may also be due to different underlying causes, and the stigma of  
17 anxiety and depression may be more socially excluding among boys than girls [2724](#).  
18 Muscular pain and tension were formerly [2149](#) thought to be mediated through mental  
19 health problems. Our findings were, however, robust to adjustment, including anxiety  
20 and depression, and merits further study.  
21  
22  
23  
24  
25  
26  
27  
28  
29  
30  
31  
32

33 In relation to weight/BMI, the literature indicates that the epidemiology and  
34 mechanisms of suicide ideation and suicide attempts differ from those leading to a  
35 completed suicide [1442](#). Consistently, population based studies of adults, have  
36 demonstrated a negative association of BMI with risk of completed suicide. In  
37 contrast, and in line with our findings among girls, several studies have demonstrated  
38 an increased risk of suicidal ideation and suicide attempts in the obese [15524349](#).  
39 Overweight might be less socially accepted in girls compared to boys, and body  
40 image perspective more dominant. Due to an earlier onset of puberty, girls were  
41 physically more mature than boys at baseline, and this difference might have  
42 influenced our results.  
43  
44  
45  
46  
47  
48  
49  
50  
51  
52  
53  
54  
55  
56  
57  
58  
59  
60

1  
2  
3  
4  
5  
6  
7  
8 Alcohol use disorders are frequently recorded in studies of completed suicide [5350](#), yet  
9  
10 our findings show a marginal association of early alcohol intoxications and  
11  
12 development of suicidal thoughts. Alcohol intoxications at baseline might not  
13  
14 represent an ideal measure to link early alcohol use to later suicidal ideation. Binge  
15  
16 drinking is a common social activity among Norwegian teenagers, and might involve  
17  
18 both protective and risk-inducing factors. For instance, [adolescents not drinking at all](#)  
19  
20 [might be more lonely and isolated](#). Alcohol intoxication [might initialize](#) an impulsive  
21  
22 attempt rather than generating suicidal thoughts. In addition early alcohol  
23  
24 involvement can act as a modifier on other risk factors. Additional analysis in our  
25  
26 study confirmed that early alcohol intoxication nearly doubled the effect  
27  
28 anxiety/depressive symptoms had on suicidal ideation.  
29  
30

31 Smoking increased odds for suicidal thoughts in our study, but was heavily correlated  
32  
33 with early alcohol intoxication. Of the 244 adolescents reporting smoking at baseline  
34  
35 199 (82%) also reported early alcohol intoxications. Both alcohol use and smoking  
36  
37 can be perceived as experimental and deviant behaviour among persons under 16.  
38  
39 They tend to identify the same group of adolescents, sharing many risk factors,  
40  
41 including conduct problems.  
42  
43

44 Among Norwegian adolescence, physical activity seemed moderately protective  
45  
46 against suicidal ideation, but the effect was most evident among boys and among  
47  
48 students without alcohol experience in secondary school. Moderating effects of  
49  
50 gender and alcohol use on health behaviour are also reported in some newer studies  
51  
52 [54-5651-53](#).  
53  
54  
55  
56  
57  
58  
59  
60

## Strengths and limitations

The Young-HUNT Study is a total population study with a high response rate and few drop-outs even at follow up. The study thus was representative for the population in Nord-Trøndelag, and Norway, -at that time, but more important, it represents a baseline for general studies of later health effects in many years to come. The study was designed for prospective investigations, with approximately 4 years follow up time. Even if 4 years seems little in prospective studies, these years represents a great leap in adolescent development. [The questionnaire included a broad collection of health and lifestyle background variables, some pre-validated, and some tested in former research from Young-HUNT<sup>57</sup>. None of the variables used have diagnostic precision, but represents broader problem groups in a majority of otherwise healthy adolescents.](#)

However, some limitations have to be pointed out. The Regional Committee for Medial and Research Ethics were concerned that even asking a question about suicidal thoughts might initiate suicidal thinking and did not allow the question in secondary school at the time. Exclusion of adolescence with suicidal thought at baseline was thus not possible, so the study is based on lifetime suicidal thoughts reported at follow up. Other studies have confirmed that suicidal thought are developing between the age of 13 and 18<sup>58,59</sup>, supporting our assumption of suicidal thought mostly emerging during follow up time. [Questions about self-harm was also excluded.](#)

[In third year of high school some students were attending vocational training, and were not at school when the study was conducted. They were tried invited by post, but response rate were low \(34%\). This represents a possible social bias, but former](#)

1  
2  
3  
4  
5  
6  
7  
8 [studies have compared the baseline responses of the missing at follow up, without](#)  
9 [finding any disturbing skewness](#) <sup>32</sup>

10  
11 [The fully adjusted models require answers in all variables, and is no way to be totally](#)  
12 [sure that the 1911 informants in the adjusted analysis are representative for the](#)  
13 [whole cohort, but the similarity in results in crude ORs and adjusted ORs are](#)  
14 [reassuring.](#)  
15  
16  
17  
18  
19

20  
21  
22  
23 According to existing literature and our factor analysis, it is not possible to separate  
24 anxiety from depression in SCL-5. [The measure used in this study therefore](#)  
25 [represents the symptom load](#) of mixed anxiety and depression. Evidence from adult  
26 population supports that mixed anxiety and depression, rather than single conditions,  
27 is strongly associated with suicide [59:6056;57](#).  
28  
29  
30  
31  
32

### 33 34 35 36 37 38 Conclusion and implications

39 Suicidal thoughts are frequent among high school students in Norway. In this study,  
40 anxiety/depression, conduct problems, overweight, together with pain and tension at  
41 the age of 13-15 years, were strongly associated with developing suicidal thoughts  
42 during late adolescence. The importance of externalizing behaviour seems under-  
43 communicated in the actual debate about risk factors and prevention of suicidal  
44 behaviours [6158](#).  
45  
46  
47  
48  
49

50 The role of early alcohol intoxication remained inconclusive, while physical activity  
51 might protect from suicidal thoughts among boys.  
52  
53  
54  
55  
56  
57  
58  
59  
60

1  
2  
3  
4  
5  
6  
7  
8 To study the pathway from suicidal thoughts to completed suicide, large scale  
9 population based studies with specified baseline measures on suicidal behaviours,  
10  
11 should be linked with hospital- and mortality registries.  
12  
13  
14  
15  
16  
17  
18  
19  
20  
21  
22  
23  
24  
25  
26  
27  
28  
29  
30  
31  
32  
33  
34  
35  
36  
37  
38  
39  
40  
41  
42  
43  
44  
45  
46  
47  
48  
49  
50  
51  
52  
53  
54  
55  
56  
57  
58  
59  
60

**Table1. Baseline prevalence of health and behavioural problems, and lifestyle.** Total N=2 399, N completers suicidal thoughts=2 271, N physical examination =2 210

|                                         | Total |      | Boys |      | Girls |      |
|-----------------------------------------|-------|------|------|------|-------|------|
|                                         | N     | %    | N    | %    | N     | %    |
| <b>Mental health variables</b>          |       |      |      |      |       |      |
| Anxiety/depressive symptoms             | 397   | 16.5 | 128  | 11.5 | 269   | 21.0 |
| Attention problems                      | 448   | 18.7 | 188  | 16.9 | 260   | 20.2 |
| Conduct problems                        | 249   | 10.4 | 181  | 16.2 | 68    | 5.3  |
| Insomnia (DIS)                          | 185   | 7.7  | 67   | 6.0  | 118   | 9.2  |
| <b>Physical health variables</b>        |       |      |      |      |       |      |
| Pain and tension problems               | 453   | 18.9 | 148  | 13.3 | 305   | 23.8 |
| Underweight* (Total N=2210)             | 149   | 6.2  | 60   | 5.4  | 89    | 6.9  |
| Overweight* (Total N=2210)              | 303   | 12.6 | 138  | 12.4 | 165   | 12.9 |
| Obesity (Total N=2210)                  | 64    | 2.7  | 35   | 3.1  | 29    | 2.3  |
| <b>Lifestyle factors</b>                |       |      |      |      |       |      |
| Early alcohol intoxication(s)           | 624   | 26.0 | 267  | 23.9 | 357   | 27.8 |
| Physical activity (4 days/week or more) | 697   | 29.1 | 397  | 35.6 | 300   | 23.4 |
| Daily or occasional smoking             | 248   | 10.3 | 87   | 7.8  | 161   | 12.1 |

\* Over- and underweight are defined by international (IOTF) criteria based on BMI cut-off in each year- and gender-cohort

20

**Table 2. Logistic regression models; single input\* age adjusted associations and fully adjusted model\*\* of health and behavioural problems, and lifestyle at baseline 1995-97 with suicidal ideation at follow-up in 2000-01. N=2 271 (completers of suicidal thoughts question).**

|                               | Total |         |       |         | Boys |         |       |         | Girls |         |       |         |
|-------------------------------|-------|---------|-------|---------|------|---------|-------|---------|-------|---------|-------|---------|
|                               | OR*   | CI      | aOR** | CI      | OR*  | CI      | aOR** | CI      | OR*   | CI      | aOR** | CI      |
| <b>Mental health issues</b>   |       |         |       |         |      |         |       |         |       |         |       |         |
| Anxiety/depressive symptoms   | 2.7   | 2.1-3.4 | 1.9   | 1.4-2.6 | 3.5  | 2.3-5.4 | 2.8   | 1.7-4.8 | 2.3   | 1.7-3.1 | 1.5   | 1.0-2.2 |
| Attention problems            | 2.1   | 1.7-2.7 | 1.3   | 1.0-1.7 | 2.2  | 1.5-3.3 | 1.3   | 0.8-2.1 | 2.0   | 1.5-2.7 | 1.2   | 0.8-1.8 |
| Conduct problems              | 2.3   | 1.7-3.1 | 1.8   | 1.3-2.6 | 2.5  | 1.7-3.7 | 1.9   | 1.2-3.1 | 3.0   | 1.8-5.1 | 1.8   | 1.0-3.4 |
| Insomnia (DIS)                | 2.3   | 1.7-3.2 | 1.4   | 0.9-2.1 | 2.1  | 1.2-3.8 | 1.1   | 0.5-2.3 | 2.3   | 1.6-3.5 | 1.5   | 1.0-2.6 |
| <b>Physical health issues</b> |       |         |       |         |      |         |       |         |       |         |       |         |
| Pain and tension problems     | 2.7   | 2.1-3.4 | 1.8   | 1.4-2.4 | 3.1  | 2.1-4.8 | 2.0   | 1.2-3.3 | 2.3   | 1.7-3.2 | 1.7   | 1.2-2.5 |
| Underweight (Total N=2 210)   | 1.3   | 0.8-2.0 | 1.5   | 0.9-2.5 | 1.4  | 0.7-2.8 | 1.8   | 0.8-4.1 | 1.2   | 0.7-2.2 | 1.4   | 0.7-2.5 |
| Overweight (Total N=2 210)    | 1.7   | 1.3-2.3 | 1.9   | 1.4-2.7 | 1.6  | 1.0-2.6 | 2.0   | 1.1-3.4 | 1.7   | 1.2-2.6 | 1.8   | 1.2-2.8 |
| Obesity (Total N=2 210)       | 1.9   | 1.0-3.4 | 1.5   | 0.8-3.1 | 0.7  | 0.2-2.3 | 0.6   | 0.1-2.5 | 3.7   | 1.7-8.0 | 3.1   | 1.2-7.7 |
| <b>Lifestyle factors</b>      |       |         |       |         |      |         |       |         |       |         |       |         |
| Early alcohol intoxication(s) | 1.7   | 1.3-2.2 | 1.2   | 0.8-1.6 | 2.1  | 1.4-3.2 | 1.5   | 0.9-2.4 | 1.5   | 1.1-2.1 | 1.0   | 0.6-1.5 |
| Physical activity             | 0.7   | 0.5-0.9 | 0.7   | 0.5-0.9 | 0.7  | 0.5-0.9 | 0.6   | 0.4-0.9 | 0.8   | 0.6-1.1 | 0.7   | 0.5-1.1 |
| Daily or occasional smoking   | 2.1   | 1.5-2.8 | 1.5   | 1.0-2.3 | 2.1  | 1.2-3.5 | 1.0   | 0.5-2.0 | 2.0   | 1.3-2.9 | 1.9   | 1.2-3.1 |

1  
2  
3  
4  
5  
6  
7  
8  
9  
10  
11  
12  
13  
14  
15  
16  
17  
18  
19  
20  
21  
22  
23  
24  
25  
26  
27  
28  
29  
30  
31  
32  
33  
34  
35  
36  
37  
38  
39  
40  
41  
42  
43  
44  
45  
46  
47  
48  
49

21

OR\* Odds ratio adjusted for age

aOR\*\* Odds Ratio adjusted for age, anxiety/depressive symptoms, attention problems, conduct problems, insomnia, pain/tension problems, physical activity, alcohol intoxications and smoking.

For peer review only

**Table 3. Logistic regression; associations of frequencies of alcohol intoxications at baseline 1995-97 with suicidal ideation at follow-up in 2000-01.** OR from single input age adjusted models, and adjusted OR (aOR) from fully adjusted models

|                     | Total |         | Boys  |         |     |         | Girls |         |     |         |       |         |
|---------------------|-------|---------|-------|---------|-----|---------|-------|---------|-----|---------|-------|---------|
|                     | OR*   | 95%CI   | aOR** | 95%CI   | OR* | 95%CI   | aOR** | 95%CI   | OR* | 95%CI   | aOR** | 95%CI   |
| No early alc. intox | 1     |         | 1     |         | 1   |         | 1     |         | 1   |         | 1     |         |
| 1-3 alc. intox      | 1.5   | 1.1-2.0 | 1.1   | 0.8-1.6 | 1.7 | 1.1-2.8 | 1.3   | 0.8-2.3 | 1.3 | 0.9-1.9 | 0.9   | 0.6-1.5 |
| >4 alc. intox       | 1.9   | 1.3-2.7 | 1.3   | 0.8-2.1 | 2.5 | 1.4-4.4 | 1.8   | 0.9-2.6 | 1.5 | 1.0-2.5 | 1.1   | 0.6-2.0 |

OR\* Odds ratio adjusted for age

aOR\*\* Odds Ratio adjusted for age, anxiety/depressive symptoms, attention problems, conduct problems, insomnia, pain/tension problems, physical activity and smoking.

### Contributorship statement

**Arve Strandheim:** primary author, formed the idea and method, analysed and wrote the draft, coordinated and finished the manuscript.

**Ottar Bjerkaset:** contributed in developing the idea, background and writing of the manuscript.

**David Gunnell:** developing the idea with the corresponding author, supervision in choice of methods and background literature in addition to forming the writing of the article.

**Sigrid Bjørnelv:** developed the methods of age- and sex stratified weight variable, wrote most of the eating part of the article and commented generally in the development of the article.

**Turid Lingaas Holmen** PI of the Young HUNT study, method supervisor, but also generally taking part in forming the text.

**Niels Bentzen** Supervisor of the whole project. He was involved in development of ideas, writing and the general progress in the work with the article.

### Competing Interest

None of the authors declare any competing interests

**Funding**

This article was funded as a part of a PhD project by a grant from the Liaison Committee between the Central Norwegian Health Authority and the Norwegian University of Science and Technology. In addition North-Trøndelag County has contributed to the project. The funding providers played no role in study design, analysis, interpretation, writing or submission of this article.

**Data sharing**

Technical appendix, statistical details and dataset are accessible from the corresponding author. Extra data can be made available by e-mailing Young-HUNT PI, Professor Turid Lingaas Holmen, turid.lingaas.holmen@ntnu.no

### Reference List

- (1) Fergusson DM, Lynskey MT. Suicide attempts and suicidal ideation in a birth cohort of 16-year-old New Zealanders. *J Am Acad Child Adolesc Psychiatry* 1995; 34(10):1308-1317.
- (2) Nock MK, Borges G, Bromet EJ, Alonso J, Angermeyer M, Beautrais A et al. Cross-national prevalence and risk factors for suicidal ideation, plans and attempts. *Br J Psychiatry* 2008; 192(2):98-105.
- (3) Ten HM, de GR, van DS, Verdurmen J, van 't LH, Vollebergh W et al. Incidence and course of suicidal ideation and suicide attempts in the general population. *Can J Psychiatry* 2009; 54(12):824-833.
- (4) Boden JM, Fergusson DM, Horwood LJ. Anxiety disorders and suicidal behaviours in adolescence and young adulthood: findings from a longitudinal study. *Psychol Med* 2007; 37(3):431-440.
- (5) Bradvik L, Mattisson C, Bogren M, Nettelbladt P. Long-term suicide risk of depression in the Lundby cohort 1947-1997--severity and gender. *Acta Psychiatr Scand* 2008; 117(3):185-191.
- (6) Brent DA. Risk factors for adolescent suicide and suicidal behavior: mental and substance abuse disorders, family environmental factors, and life stress. *Suicide Life Threat Behav* 1995; 25 Suppl:52-63.
- (7) Enns MW, Cox BJ, Afifi TO, de GR, Ten HM, Sareen J. Childhood adversities and risk for suicidal ideation and attempts: a longitudinal population-based study. *Psychol Med* 2006; 36(12):1769-1778.
- (8) Sund AM, Larsson B, Wichstrom L. Psychosocial correlates of depressive symptoms among 12-14-year-old Norwegian adolescents. *J Child Psychol Psychiatry* 2003; 44(4):588-597.
- (9) Wichstrom L. Predictors of adolescent suicide attempts: a nationally representative longitudinal study of Norwegian adolescents. *J Am Acad Child Adolesc Psychiatry* 2000; 39(5):603-610.
- (10) Chronis-Tuscano A, Molina BS, Pelham WE, Applegate B, Dahlke A, Overmyer M et al. Very early predictors of adolescent depression and suicide attempts in children with attention-deficit/hyperactivity disorder. *Arch Gen Psychiatry* 2010; 67(10):1044-1051.
- (11) Evans E, Hawton K, Rodham K. Factors associated with suicidal phenomena in adolescents: a systematic review of population-based studies. *Clin Psychol Rev* 2004; 24(8):957-979.

- 1  
2  
3  
4  
5  
6  
7  
8  
9  
10  
11  
12  
13  
14  
15  
16  
17  
18  
19  
20  
21  
22  
23  
24  
25  
26  
27  
28  
29  
30  
31  
32  
33  
34  
35  
36  
37  
38  
39  
40  
41  
42  
43  
44  
45  
46  
47  
48  
49  
50  
51  
52  
53  
54  
55  
56  
57  
58  
59  
60
- (12) [Boden JM, Fergusson DM, Horwood LJ. Anxiety disorders and suicidal behaviours in adolescence and young adulthood: findings from a longitudinal study. \*Psychol Med\* 2007; 37\(3\):431-440.](#)
- (13) [Gunnell D, Harbord R, Singleton N, Jenkins R, Lewis G. Factors influencing the development and amelioration of suicidal thoughts in the general population. Cohort study. \*Br J Psychiatry\* 2004; 185:385-393.](#)
- (14) [Bjerkeset O, Romundstad P, Evans J, Gunnell D. Association of adult body mass index and height with anxiety, depression, and suicide in the general population: the HUNT study. \*Am J Epidemiol\* 2008; 167\(2\):193-202.](#)
- (15) [Carpenter KM, Hasin DS, Allison DB, Faith MS. Relationships between obesity and DSM-IV major depressive disorder, suicide ideation, and suicide attempts: results from a general population study. \*Am J Public Health\* 2000; 90\(2\):251-257.](#)
- (16) [Crow S, Eisenberg ME, Story M, Neumark-Sztainer D. Are body dissatisfaction, eating disturbance, and body mass index predictors of suicidal behavior in adolescents? A longitudinal study. \*J Consult Clin Psychol\* 2008; 76\(5\):887-892.](#)
- (17) [Wilcox HC, Conner KR, Caine ED. Association of alcohol and drug use disorders and completed suicide: an empirical review of cohort studies. \*Drug Alcohol Depend\* 2004; 76 Suppl:S11-S19.](#)
- (18) [Borges G, Walters EE, Kessler RC. Associations of substance use, abuse, and dependence with subsequent suicidal behavior. \*Am J Epidemiol\* 2000; 151\(8\):781-789.](#)
- (19) [Chatterji P, Dave D, Kaestner R, Markowitz S. Alcohol abuse and suicide attempts among youth. \*Econ Hum Biol\* 2004; 2\(2\):159-180.](#)
- (20) [Roane BM, Taylor DJ. Adolescent insomnia as a risk factor for early adult depression and substance abuse. \*Sleep\* 2008; 31\(10\):1351-1356.](#)
- (21) [Braden JB, Sullivan MD. Suicidal thoughts and behavior among adults with self-reported pain conditions in the national comorbidity survey replication. \*J Pain\* 2008; 9\(12\):1106-1115.](#)
- (22) [Woolley SB, Fredman L, Goethe JW, Lincoln AK, Heeren T. Headache complaints and the risk of suicidal thoughts or behaviors. \*J Nerv Ment Dis\* 2008; 196\(11\):822-828.](#)
- (23) [Bronisch T, Hofler M, Lieb R. Smoking predicts suicidality: findings from a prospective community study. \*J Affect Disord\* 2008; 108\(1-2\):135-145.](#)
- (24) [Sagatun A, Sogaard AJ, Bjertness E, Selmer R, Heyerdahl S. The association between weekly hours of physical activity and mental health: a three-year follow-up study of 15-16-year-old students in the city of Oslo, Norway. \*BMC Public Health\* 2007; 7:155.](#)

- 1  
2  
3  
4  
5  
6  
7  
8 (25) Sund AM, Larsson B, Wichstrom L. Role of physical and sedentary activities in the  
9 development of depressive symptoms in early adolescence. *Soc Psychiatry Psychiatr*  
10 *Epidemiol* 2011; 46(5):431-441.
- 11 (26) Groholt B, Ekeberg O, Wichstrom L, Haldorsen T. Sex differences in adolescent  
12 suicides in Norway, 1990-1992. *Suicide Life Threat Behav* 1999; 29(4):295-308.
- 13 (27) Lewinsohn PM, Rohde P, Seeley JR, Baldwin CL. Gender differences in suicide  
14 attempts from adolescence to young adulthood. *J Am Acad Child Adolesc Psychiatry*  
15 2001; 40(4):427-434.
- 16 (28) Cantor C, Neulinger K. The epidemiology of suicide and attempted suicide among  
17 young Australians. *Aust N Z J Psychiatry* 2000; 34(3):370-387.
- 18 (29) Heuveline P, Slap GB. Adolescent and young adult mortality by cause: age, gender,  
19 and country, 1955 to 1994. *J Adolesc Health* 2002; 30(1):29-34.
- 20 (30) Boeninger DK, Masyn KE, Feldman BJ, Conger RD. Sex differences in  
21 developmental trends of suicide ideation, plans, and attempts among European  
22 American adolescents. *Suicide Life Threat Behav* 2010; 40(5):451-464.
- 23 (31) Mather AA, Cox BJ, Enns MW, Sareen J. Associations of obesity with psychiatric  
24 disorders and suicidal behaviors in a nationally representative sample. *J Psychosom*  
25 *Res* 2009; 66(4):277-285.
- 26 (32) Holmen TL, Bratberg G, Krokstad S, Langhammer A, Hveem K, Midthjell K et al.  
27 Cohort profile of the Young-HUNT Study, Norway: a population-based study of  
28 adolescents. *Int J Epidemiol* 2014; 43(2):536-544.
- 29 (33) Strandheim A, Holmen TL, Coombes L, Bentzen N. Alcohol intoxication and mental  
30 health among adolescents - a population review of 8983 young people, 13-19 years in  
31 North-Trondelag, Norway: the Young-HUNT Study. *Child Adolesc Psychiatry Ment*  
32 *Health* 2009; 3(1):18.
- 33 (34) Strandheim A, Holmen TL, Coombes L, Bentzen N. Alcohol use and physical health  
34 in adolescence: a general population survey of 8,983 young people in North-  
35 Trondelag, Norway (the Young-HUNT study). *Subst Use Misuse* 2010; 45(1-2):253-  
36 265.
- 37 (35) Pedersen G, Karterud S. Is SCL-90R helpful for the clinician in assessing DSM-IV  
38 symptom disorders? *Acta Psychiatr Scand* 2004; 110(3):215-224.
- 39 (36) Tambs K, Moum T. How well can a few questionnaire items indicate anxiety and  
40 depression? *Acta Psychiatr Scand* 1993; 87(5):364-367.
- 41 (37) Strand BH, Dalgard OS, Tambs K, Rognerud M. Measuring the mental health status  
42 of the Norwegian population: a comparison of the instruments SCL-25, SCL-10, SCL-  
43 5 and MHI-5 (SF-36). *Nord J Psychiatry* 2003; 57(2):113-118.
- 44  
45  
46  
47  
48  
49  
50  
51  
52  
53  
54  
55  
56  
57  
58  
59  
60

- 1  
2  
3  
4  
5  
6  
7  
8 (38) [Storksen I, Roysamb E, Moum T, Tambs K. Adolescents with a childhood experience of parental divorce: a longitudinal study of mental health and adjustment. \*J Adolesc\* 2005; 28\(6\):725-739.](#)
- 9  
10  
11 (39) [Storksen I, Roysamb E, Holmen TL, Tambs K. Adolescent adjustment and well-being: effects of parental divorce and distress. \*Scand J Psychol\* 2006; 47\(1\):75-84.](#)
- 12  
13  
14 (40) [Neckelmann D, Mykletun A, Dahl AA. Chronic insomnia as a risk factor for developing anxiety and depression. \*Sleep\* 2007; 30\(7\):873-880.](#)
- 15  
16  
17 (41) [Booth ML, Okely AD, Chey T, Bauman A. The reliability and validity of the physical activity questions in the WHO health behaviour in schoolchildren \(HBSC\) survey: a population study. \*Br J Sports Med\* 2001; 35\(4\):263-267.](#)
- 18  
19  
20 (42) [Bjornelv S, Lydersen S, Mykletun A, Holmen TL. Changes in BMI-distribution from 1966-69 to 1995-97 in adolescents. The Young-HUNT study, Norway. \*BMC Public Health\* 2007; 7:279.](#)
- 21  
22  
23 (43) [Cole TJ, Flegal KM, Nicholls D, Jackson AA. Body mass index cut offs to define thinness in children and adolescents: international survey. \*BMJ\* 2007; 335\(7612\):194.](#)
- 24  
25  
26 (44) [Strandheim A, Holmen TL, Coombes L, Bentzen N. Alcohol intoxication and mental health among adolescents - a population review of 8983 young people, 13-19 years in North-Trondelag, Norway: the Young-HUNT Study. \*Child Adolesc Psychiatry Ment Health\* 2009; 3\(1\):18.](#)
- 27  
28  
29 (45) [Strandheim A, Bratberg GH, Holmen TL, Coombes L, Bentzen N. The influence of behavioural and health problems on alcohol and drug use in late adolescence - a follow up study of 2 399 young Norwegians. \*Child Adolesc Psychiatry Ment Health\* 2011; 5\(1\):17.](#)
- 30  
31  
32 (46) [Engqvist U, Rydelius PA. Death and suicide among former child and adolescent psychiatric patients. \*BMC Psychiatry\* 2006; 6:51.](#)
- 33  
34  
35 (47) [Harris EC, Barraclough B. Suicide as an outcome for mental disorders. A meta-analysis. \*Br J Psychiatry\* 1997; 170:205-228.](#)
- 36  
37  
38 (48) [Glass K, Flory K, Martin A, Hankin BL. ADHD and comorbid conduct problems among adolescents: associations with self-esteem and substance use. \*Atten Defic Hyperact Disord\* 2011; 3\(1\):29-39.](#)
- 39  
40  
41 (49) [Kirkcaldy BD, Siefen GR, Urkin J, Merrick J. Risk factors for suicidal behavior in adolescents. \*Minerva Pediatr\* 2006; 58\(5\):443-450.](#)
- 42  
43  
44 (50) [Huh Y, Choi I, Song M, Kim S, Hong SD, Joung Y. A comparison of comorbidity and psychological outcomes in children and adolescents with attention-deficit/hyperactivity disorder. \*Psychiatry Investig\* 2011; 8\(2\):95-101.](#)
- 45  
46  
47 (51) [Rutter M. Research review: Child psychiatric diagnosis and classification: concepts, findings, challenges and potential. \*J Child Psychol Psychiatry\* 2011; 52\(6\):647-660.](#)
- 48  
49  
50  
51  
52  
53  
54  
55  
56  
57  
58  
59  
60

- (52) Brunner J, Bronisch T, Pfister H, Jacobi F, Hofler M, Wittchen HU. High cholesterol, triglycerides, and body-mass index in suicide attempters. *Arch Suicide Res* 2006; 10(1):1-9.
- (53) Galaif ER, Sussman S, Newcomb MD, Locke TF. Suicidality, depression, and alcohol use among adolescents: a review of empirical findings. *Int J Adolesc Med Health* 2007; 19(1):27-35.
- (54) Barry AE, Piazza-Gardner AK. Drunkorexia: understanding the co-occurrence of alcohol consumption and eating/exercise weight management behaviors. *J Am Coll Health* 2012; 60(3):236-243.
- (55) Buscemi J, Martens MP, Murphy JG, Yurasek AM, Smith AE. Moderators of the relationship between physical activity and alcohol consumption in college students. *J Am Coll Health* 2011; 59(6):503-509.
- (56) Kwan MY, Cairney J, Faulkner GE, Pullenavegum EE. Physical activity and other health-risk behaviors during the transition into early adulthood: a longitudinal cohort study. *Am J Prev Med* 2012; 42(1):14-20.
- (57) Bratberg GH, Nilsen TI, Holmen TL, Vatten LJ. Sexual maturation in early adolescence and alcohol drinking and cigarette smoking in late adolescence: a prospective study of 2,129 Norwegian girls and boys. *Eur J Pediatr* 2005; 164(10):621-625.
- (58) Glowinski AL, Bucholz KK, Nelson EC, Fu Q, Madden PA, Reich W et al. Suicide attempts in an adolescent female twin sample. *J Am Acad Child Adolesc Psychiatry* 2001; 40(11):1300-1307.
- (59) Mykletun A, Bjerkeset O, Dewey M, Prince M, Overland S, Stewart R. Anxiety, depression, and cause-specific mortality: the HUNT study. *Psychosom Med* 2007; 69(4):323-331.
- (60) Bjerkeset O, Mykletun A, Dahl AA, Linaker O. Mortality in relation to self-reported mixed anxiety and depression symptoms--The HUNT study. *Nord J Psychiatry* 2007; 61(1):6-11.
- (61) Nordentoft M. Prevention of suicide and attempted suicide in Denmark. *Epidemiological studies of suicide and intervention studies in selected risk groups. Dan Med Bull* 2007; 54(4):306-369.

#### Reference List

- (1) Fergusson DM, Lynskey MT. Suicide attempts and suicidal ideation in a birth cohort of 16-year-old New Zealanders. *J Am Acad Child Adolesc Psychiatry* 1995; 34(10):1308-1317.

- (2) Nock MK, Borges G, Bromet EJ, Alonso J, Angermeyer M, Beautrais A et al. Cross-national prevalence and risk factors for suicidal ideation, plans and attempts. *Br J Psychiatry* 2008; 192(2):98-105.
- (3) Ten HM, de GR, van DS, Verdurmen J, van 't LH, Vollebergh W et al. Incidence and course of suicidal ideation and suicide attempts in the general population. *Can J Psychiatry* 2009; 54(12):824-833.
- (4) Boden JM, Fergusson DM, Horwood LJ. Anxiety disorders and suicidal behaviours in adolescence and young adulthood: findings from a longitudinal study. *Psychol Med* 2007; 37(3):431-440.
- (5) Bradvik L, Mattisson C, Bogren M, Nettelbladt P. Long term suicide risk of depression in the Lundby cohort 1947-1997—severity and gender. *Acta Psychiatr Scand* 2008; 117(3):185-191.
- (6) Brent DA. Risk factors for adolescent suicide and suicidal behavior: mental and substance abuse disorders, family environmental factors, and life stress. *Suicide Life Threat Behav* 1995; 25 Suppl:52-63.
- (7) Enns MW, Cox BJ, Afifi TO, de GR, Ten HM, Sareen J. Childhood adversities and risk for suicidal ideation and attempts: a longitudinal population-based study. *Psychol Med* 2006; 36(12):1769-1778.
- (8) Chronis-Tuscano A, Molina BS, Pelham WE, Applegate B, Dahlke A, Overmyer M et al. Very early predictors of adolescent depression and suicide attempts in children with attention deficit/hyperactivity disorder. *Arch Gen Psychiatry* 2010; 67(10):1044-1051.
- (9) Evans E, Hawton K, Rodham K. Factors associated with suicidal phenomena in adolescents: a systematic review of population-based studies. *Clin Psychol Rev* 2004; 24(8):957-979.
- (10) Boden JM, Fergusson DM, Horwood LJ. Anxiety disorders and suicidal behaviours in adolescence and young adulthood: findings from a longitudinal study. *Psychol Med* 2007; 37(3):431-440.
- (11) Gunnell D, Harbord R, Singleton N, Jenkins R, Lewis G. Factors influencing the development and amelioration of suicidal thoughts in the general population. Cohort study. *Br J Psychiatry* 2004; 185:385-393.
- (12) Bjerkeset O, Romundstad P, Evans J, Gunnell D. Association of adult body mass index and height with anxiety, depression, and suicide in the general population: the HUNT study. *Am J Epidemiol* 2008; 167(2):193-202.
- (13) Carpenter KM, Hasin DS, Allison DB, Faith MS. Relationships between obesity and DSM-IV major depressive disorder, suicide ideation, and suicide attempts: results from a general population study. *Am J Public Health* 2000; 90(2):251-257.

- 1  
2  
3  
4  
5  
6  
7  
8  
9  
10  
11  
12  
13  
14  
15  
16  
17  
18  
19  
20  
21  
22  
23  
24  
25  
26  
27  
28  
29  
30  
31  
32  
33  
34  
35  
36  
37  
38  
39  
40  
41  
42  
43  
44  
45  
46  
47  
48  
49  
50  
51  
52  
53  
54  
55  
56  
57  
58  
59  
60
- (14) Crow S, Eisenberg ME, Story M, Neumark-Sztainer D. Are body dissatisfaction, eating disturbance, and body mass index predictors of suicidal behavior in adolescents? A longitudinal study. *J Consult Clin Psychol* 2008; 76(5):887-892.
  - (15) Wilcox HC, Conner KR, Caine ED. Association of alcohol and drug use disorders and completed suicide: an empirical review of cohort studies. *Drug Alcohol Depend* 2004; 76 Suppl:S11-S19.
  - (16) Borges G, Walters EE, Kessler RC. Associations of substance use, abuse, and dependence with subsequent suicidal behavior. *Am J Epidemiol* 2000; 151(8):781-789.
  - (17) Chatterji P, Dave D, Kaestner R, Markowitz S. Alcohol abuse and suicide attempts among youth. *Econ Hum Biol* 2004; 2(2):159-180.
  - (18) Roane BM, Taylor DJ. Adolescent insomnia as a risk factor for early adult depression and substance abuse. *Sleep* 2008; 31(10):1351-1356.
  - (19) Braden JB, Sullivan MD. Suicidal thoughts and behavior among adults with self-reported pain conditions in the national comorbidity survey replication. *J Pain* 2008; 9(12):1106-1115.
  - (20) Woolley SB, Fredman L, Goethe JW, Lincoln AK, Heeren T. Headache complaints and the risk of suicidal thoughts or behaviors. *J Nerv Ment Dis* 2008; 196(11):822-828.
  - (21) Bronisch T, Hofler M, Lieb R. Smoking predicts suicidality: findings from a prospective community study. *J Affect Disord* 2008; 108(1-2):135-145.
  - (22) Sagatun A, Sogaard AJ, Bjertness E, Selmer R, Heyerdahl S. The association between weekly hours of physical activity and mental health: a three year follow up study of 15-16-year-old students in the city of Oslo, Norway. *BMC Public Health* 2007; 7:155.
  - (23) Groholt B, Ekeberg O, Wichstrom L, Haldorsen T. Sex differences in adolescent suicides in Norway, 1990-1992. *Suicide Life Threat Behav* 1999; 29(4):295-308.
  - (24) Lewinsohn PM, Rohde P, Seeley JR, Baldwin CL. Gender differences in suicide attempts from adolescence to young adulthood. *J Am Acad Child Adolesc Psychiatry* 2001; 40(4):427-434.
  - (25) Cantor C, Neulinger K. The epidemiology of suicide and attempted suicide among young Australians. *Aust N Z J Psychiatry* 2000; 34(3):370-387.
  - (26) Heuveline P, Slap GB. Adolescent and young adult mortality by cause: age, gender, and country, 1955 to 1994. *J Adolesc Health* 2002; 30(1):29-34.
  - (27) Boeninger DK, Masyn KE, Feldman BJ, Conger RD. Sex differences in developmental trends of suicide ideation, plans, and attempts among European American adolescents. *Suicide Life Threat Behav* 2010; 40(5):451-464.

- 1  
2  
3  
4  
5  
6  
7  
8  
9  
10  
11  
12  
13  
14  
15  
16  
17  
18  
19  
20  
21  
22  
23  
24  
25  
26  
27  
28  
29  
30  
31  
32  
33  
34  
35  
36  
37  
38  
39  
40  
41  
42  
43  
44  
45  
46  
47  
48  
49  
50  
51  
52  
53  
54  
55  
56  
57  
58  
59  
60
- (28) Mather AA, Cox BJ, Enns MW, Sareen J. Associations of obesity with psychiatric disorders and suicidal behaviors in a nationally representative sample. *J Psychosom Res* 2009; 66(4):277-285.
  - (29) Holmen TL, Bratberg G, Krokstad S, Langhammer A, Hveem K, Midthjell K et al. Cohort profile of the Young HUNT Study, Norway: A population based study of adolescents. *Int J Epidemiol* 2013.
  - (30) Strandheim A, Holmen TL, Coombes L, Bentzen N. Alcohol intoxication and mental health among adolescents—a population review of 8983 young people, 13-19 years in North-Trøndelag, Norway: the Young HUNT Study. *Child Adolesc Psychiatry Ment Health* 2009; 3(1):18.
  - (31) Strandheim A, Holmen TL, Coombes L, Bentzen N. Alcohol use and physical health in adolescence: a general population survey of 8,983 young people in North-Trøndelag, Norway (the Young HUNT study). *Subst Use Misuse* 2010; 45(1-2):253-265.
  - (32) Pedersen G, Karterud S. Is SCL-90R helpful for the clinician in assessing DSM-IV symptom disorders? *Acta Psychiatr Scand* 2004; 110(3):215-224.
  - (33) Tambs K, Moum T. How well can a few questionnaire items indicate anxiety and depression? *Acta Psychiatr Scand* 1993; 87(5):364-367.
  - (34) Strand BH, Dalgard OS, Tambs K, Rognerud M. Measuring the mental health status of the Norwegian population: a comparison of the instruments SCL-25, SCL-10, SCL-5 and MHI-5 (SF-36). *Nord J Psychiatry* 2003; 57(2):113-118.
  - (35) Storksen I, Roysamb E, Moum T, Tambs K. Adolescents with a childhood experience of parental divorce: a longitudinal study of mental health and adjustment. *J Adolescence* 2005; 28(6):725-739.
  - (36) Storksen I, Roysamb E, Holmen TL, Tambs K. Adolescent adjustment and well-being: effects of parental divorce and distress. *Scand J Psychol* 2006; 47(1):75-84.
  - (37) Neckelmann D, Mykletun A, Dahl AA. Chronic insomnia as a risk factor for developing anxiety and depression. *Sleep* 2007; 30(7):873-880.
  - (38) Booth ML, Okely AD, Chey T, Bauman A. The reliability and validity of the physical activity questions in the WHO health behaviour in schoolchildren (HBSC) survey: a population study. *Br J Sports Med* 2001; 35(4):263-267.
  - (39) Bjornelv S, Lydersen S, Mykletun A, Holmen TL. Changes in BMI distribution from 1966-69 to 1995-97 in adolescents. The Young HUNT study, Norway. *BMC Public Health* 2007; 7:279.
  - (40) Cole TJ, Flegal KM, Nicholls D, Jackson AA. Body mass index cut offs to define thinness in children and adolescents: international survey. *BMJ* 2007; 335(7612):194.

- 1  
2  
3  
4  
5  
6  
7  
8  
9  
10  
11  
12  
13  
14  
15  
16  
17  
18  
19  
20  
21  
22  
23  
24  
25  
26  
27  
28  
29  
30  
31  
32  
33  
34  
35  
36  
37  
38  
39  
40  
41  
42  
43  
44  
45  
46  
47  
48  
49  
50  
51  
52  
53  
54  
55  
56  
57  
58  
59  
60
- (41) Strandheim A, Holmen TL, Coombes L, Bentzen N. Alcohol intoxication and mental health among adolescents—a population review of 8983 young people, 13–19 years in North Trøndelag, Norway: the Young HUNT Study. *Child Adolesc Psychiatry Ment Health* 2009; 3(1):18.
  - (42) Strandheim A, Bratberg GH, Holmen TL, Coombes L, Bentzen N. The influence of behavioural and health problems on alcohol and drug use in late adolescence—a follow-up study of 2 399 young Norwegians. *Child Adolesc Psychiatry Ment Health* 2011; 5(1):17.
  - (43) Engqvist U, Rydelius PA. Death and suicide among former child and adolescent psychiatric patients. *BMC Psychiatry* 2006; 6:51.
  - (44) Harris EC, Barraclough B. Suicide as an outcome for mental disorders. A meta-analysis. *Br J Psychiatry* 1997; 170:205–228.
  - (45) Glass K, Flory K, Martin A, Hankin BL. ADHD and comorbid conduct problems among adolescents: associations with self-esteem and substance use. *Atten Defic Hyperact Disord* 2011; 3(1):29–39.
  - (46) Kirkealdy BD, Siefen GR, Urkin J, Merriek J. Risk factors for suicidal behavior in adolescents. *Minerva Pediatr* 2006; 58(5):443–450.
  - (47) Huh Y, Choi I, Song M, Kim S, Hong SD, Joung Y. A comparison of comorbidity and psychological outcomes in children and adolescents with attention-deficit/hyperactivity disorder. *Psychiatry Investig* 2011; 8(2):95–101.
  - (48) Rutter M. Research review: Child psychiatric diagnosis and classification: concepts, findings, challenges and potential. *J Child Psychol Psychiatry* 2011; 52(6):647–660.
  - (49) Brunner J, Bronisch T, Pfister H, Jacobi F, Hofler M, Wittchen HU. High cholesterol, triglycerides, and body mass index in suicide attempters. *Arch Suicide Res* 2006; 10(1):1–9.
  - (50) Galaif ER, Sussman S, Newcomb MD, Locke TF. Suicidality, depression, and alcohol use among adolescents: a review of empirical findings. *Int J Adolesc Med Health* 2007; 19(1):27–35.
  - (51) Barry AE, Piazza-Gardner AK. Drunkorexia: understanding the co-occurrence of alcohol consumption and eating/exercise weight management behaviors. *J Am Coll Health* 2012; 60(3):236–243.
  - (52) Buscemi J, Martens MP, Murphy JG, Yurasek AM, Smith AE. Moderators of the relationship between physical activity and alcohol consumption in college students. *J Am Coll Health* 2011; 59(6):503–509.
  - (53) Kwan MY, Cairney J, Faulkner GE, Pullenayegum EE. Physical activity and other health risk behaviors during the transition into early adulthood: a longitudinal cohort study. *Am J Prev Med* 2012; 42(1):14–20.

- 1  
2  
3  
4  
5  
6  
7  
8  
9  
10  
11  
12  
13  
14  
15  
16  
17  
18  
19  
20  
21  
22  
23  
24  
25  
26  
27  
28  
29  
30  
31  
32  
33  
34  
35  
36  
37  
38  
39  
40  
41  
42  
43  
44  
45  
46  
47  
48  
49  
50  
51  
52  
53  
54  
55  
56  
57  
58  
59  
60
- (54) Bratberg GH, Nilsen TI, Holmen TL, Vatten LJ. Sexual maturation in early adolescence and alcohol drinking and cigarette smoking in late adolescence: a prospective study of 2,129 Norwegian girls and boys. *Eur J Pediatr* 2005; 164(10):621-625.
  - (55) Glowinski AL, Bucholz KK, Nelson EC, Fu Q, Madden PA, Reich W et al. Suicide attempts in an adolescent female twin sample. *J Am Acad Child Adolesc Psychiatry* 2001; 40(11):1300-1307.
  - (56) Mykletun A, Bjerkeset O, Dewey M, Prince M, Overland S, Stewart R. Anxiety, depression, and cause specific mortality: the HUNT study. *Psychosom Med* 2007; 69(4):323-331.
  - (57) Bjerkeset O, Mykletun A, Dahl AA, Linaker O. Mortality in relation to self reported mixed anxiety and depression symptoms—The HUNT study. *Nord J Psychiatry* 2007; 61(1):6-11.
  - (58) Nordentoft M. Prevention of suicide and attempted suicide in Denmark. *Epidemiological studies of suicide and intervention studies in selected risk groups. Dan Med Bull* 2007; 54(4):306-369.

#### Acknowledgments:

The Nord-Trøndelag Health Study (The HUNT Study) is collaboration between HUNT Research Centre (Faculty of Medicine, Norwegian University of Science and Technology NTNU), Nord-Trøndelag County Council, Central Norway Health Authority, and the Norwegian Institute of Public Health.

STROBE Statement—checklist of items that should be included in reports of observational studies  
*My responses are marked by X= checked (AS)*

|                              | Item No | Recommendation                                                                                                                                                                         |
|------------------------------|---------|----------------------------------------------------------------------------------------------------------------------------------------------------------------------------------------|
| <b>Title and abstract</b>    | 1       | (a) X Indicate the study's design with a commonly used term in the title or the abstract                                                                                               |
|                              |         | (b) X Provide in the abstract an informative and balanced summary of what was done and what was found                                                                                  |
| <b>Introduction</b>          |         |                                                                                                                                                                                        |
| Background/rationale         | 2       | X Explain the scientific background and rationale for the investigation being reported                                                                                                 |
| Objectives                   | 3       | X State specific objectives, including any prespecified hypotheses                                                                                                                     |
| <b>Methods</b>               |         |                                                                                                                                                                                        |
| Study design                 | 4       | X Present key elements of study design early in the paper                                                                                                                              |
| Setting                      | 5       | X Describe the setting, locations, and relevant dates, including periods of recruitment, exposure, follow-up, and data collection                                                      |
| Participants                 | 6       | (a) X <i>Cohort study</i> —Give the eligibility criteria, and the sources and methods of selection of participants. Describe methods of follow-up                                      |
|                              |         | (b)                                                                                                                                                                                    |
| Variables                    | 7       | X Clearly define all outcomes, exposures, predictors, potential confounders, and effect modifiers. Give diagnostic criteria, if applicable                                             |
| Data sources/<br>measurement | 8*      | X For each variable of interest, give sources of data and details of methods of assessment (measurement). Describe comparability of assessment methods if there is more than one group |
| Bias                         | 9       | X Describe any efforts to address potential sources of bias                                                                                                                            |
| Study size                   | 10      | X Explain how the study size was arrived at                                                                                                                                            |
| Quantitative variables       | 11      | X Explain how quantitative variables were handled in the analyses. If applicable, describe which groupings were chosen and why                                                         |
| Statistical methods          | 12      | (a) X Describe all statistical methods, including those used to control for confounding                                                                                                |
|                              |         | (b) X Describe any methods used to examine subgroups and interactions                                                                                                                  |
|                              |         | (c) X Explain how missing data were addressed                                                                                                                                          |

Continued on next page

**Results**

|                          |     |                                                                                                                                                                                                                                                                                                                           |
|--------------------------|-----|---------------------------------------------------------------------------------------------------------------------------------------------------------------------------------------------------------------------------------------------------------------------------------------------------------------------------|
| Participants             | 13* | (a) X Report numbers of individuals at each stage of study—eg numbers potentially eligible, examined for eligibility, confirmed eligible, included in the study, completing follow-up, and analysed                                                                                                                       |
| Descriptive data         | 14* | (a) X Give characteristics of study participants (eg demographic, clinical, social) and information on exposures and potential confounders<br>(b) X Indicate number of participants with missing data for each variable of interest<br>(c) X <i>Cohort study</i> —Summarise follow-up time (eg, average and total amount) |
| Outcome data             | 15* | X <i>Cohort study</i> —Report numbers of outcome events or summary measures over time                                                                                                                                                                                                                                     |
| Main results             | 16  | (a) X Give unadjusted estimates and, if applicable, confounder-adjusted estimates and their precision (eg, 95% confidence interval). Make clear which confounders were adjusted for and why they were included<br>(b) X Report category boundaries when continuous variables were categorized<br>(c)                      |
| Other analyses           | 17  | X Report other analyses done—eg analyses of subgroups and interactions, and sensitivity analyses                                                                                                                                                                                                                          |
| <b>Discussion</b>        |     |                                                                                                                                                                                                                                                                                                                           |
| Key results              | 18  | X Summarise key results with reference to study objectives                                                                                                                                                                                                                                                                |
| Limitations              | 19  | X Discuss limitations of the study, taking into account sources of potential bias or imprecision. Discuss both direction and magnitude of any potential bias                                                                                                                                                              |
| Interpretation           | 20  | X Give a cautious overall interpretation of results considering objectives, limitations, multiplicity of analyses, results from similar studies, and other relevant evidence                                                                                                                                              |
| Generalisability         | 21  | X Discuss the generalisability (external validity) of the study results                                                                                                                                                                                                                                                   |
| <b>Other information</b> |     |                                                                                                                                                                                                                                                                                                                           |
| Funding                  | 22  | X Give the source of funding and the role of the funders for the present study and, if applicable, for the original study on which the present article is based                                                                                                                                                           |

\*Give information separately for cases and controls in case-control studies and, if applicable, for exposed and unexposed groups in cohort and cross-sectional studies.

**Note:** An Explanation and Elaboration article discusses each checklist item and gives methodological background and published examples of transparent reporting. The STROBE checklist is best used in conjunction with this article (freely available on the Web sites of PLoS Medicine at <http://www.plosmedicine.org/>, Annals of Internal Medicine at <http://www.annals.org/>, and Epidemiology at <http://www.epidem.com/>). Information on the STROBE Initiative is available at [www.strobe-statement.org](http://www.strobe-statement.org).
